# Supplementary material for: A Genome-Wide Analysis of the Pentatricopeptide Repeat (PPR) Gene Family and PPR-Derived Markers for Flesh Color in Watermelon (Citrullus lanatus)
Source: MDPI journal article supplement (doi:10.3390/genes11101125), 2020-09-24

**Figure S1. The Conserved motifs in ClaPPR proteins by using MEME Suite.**

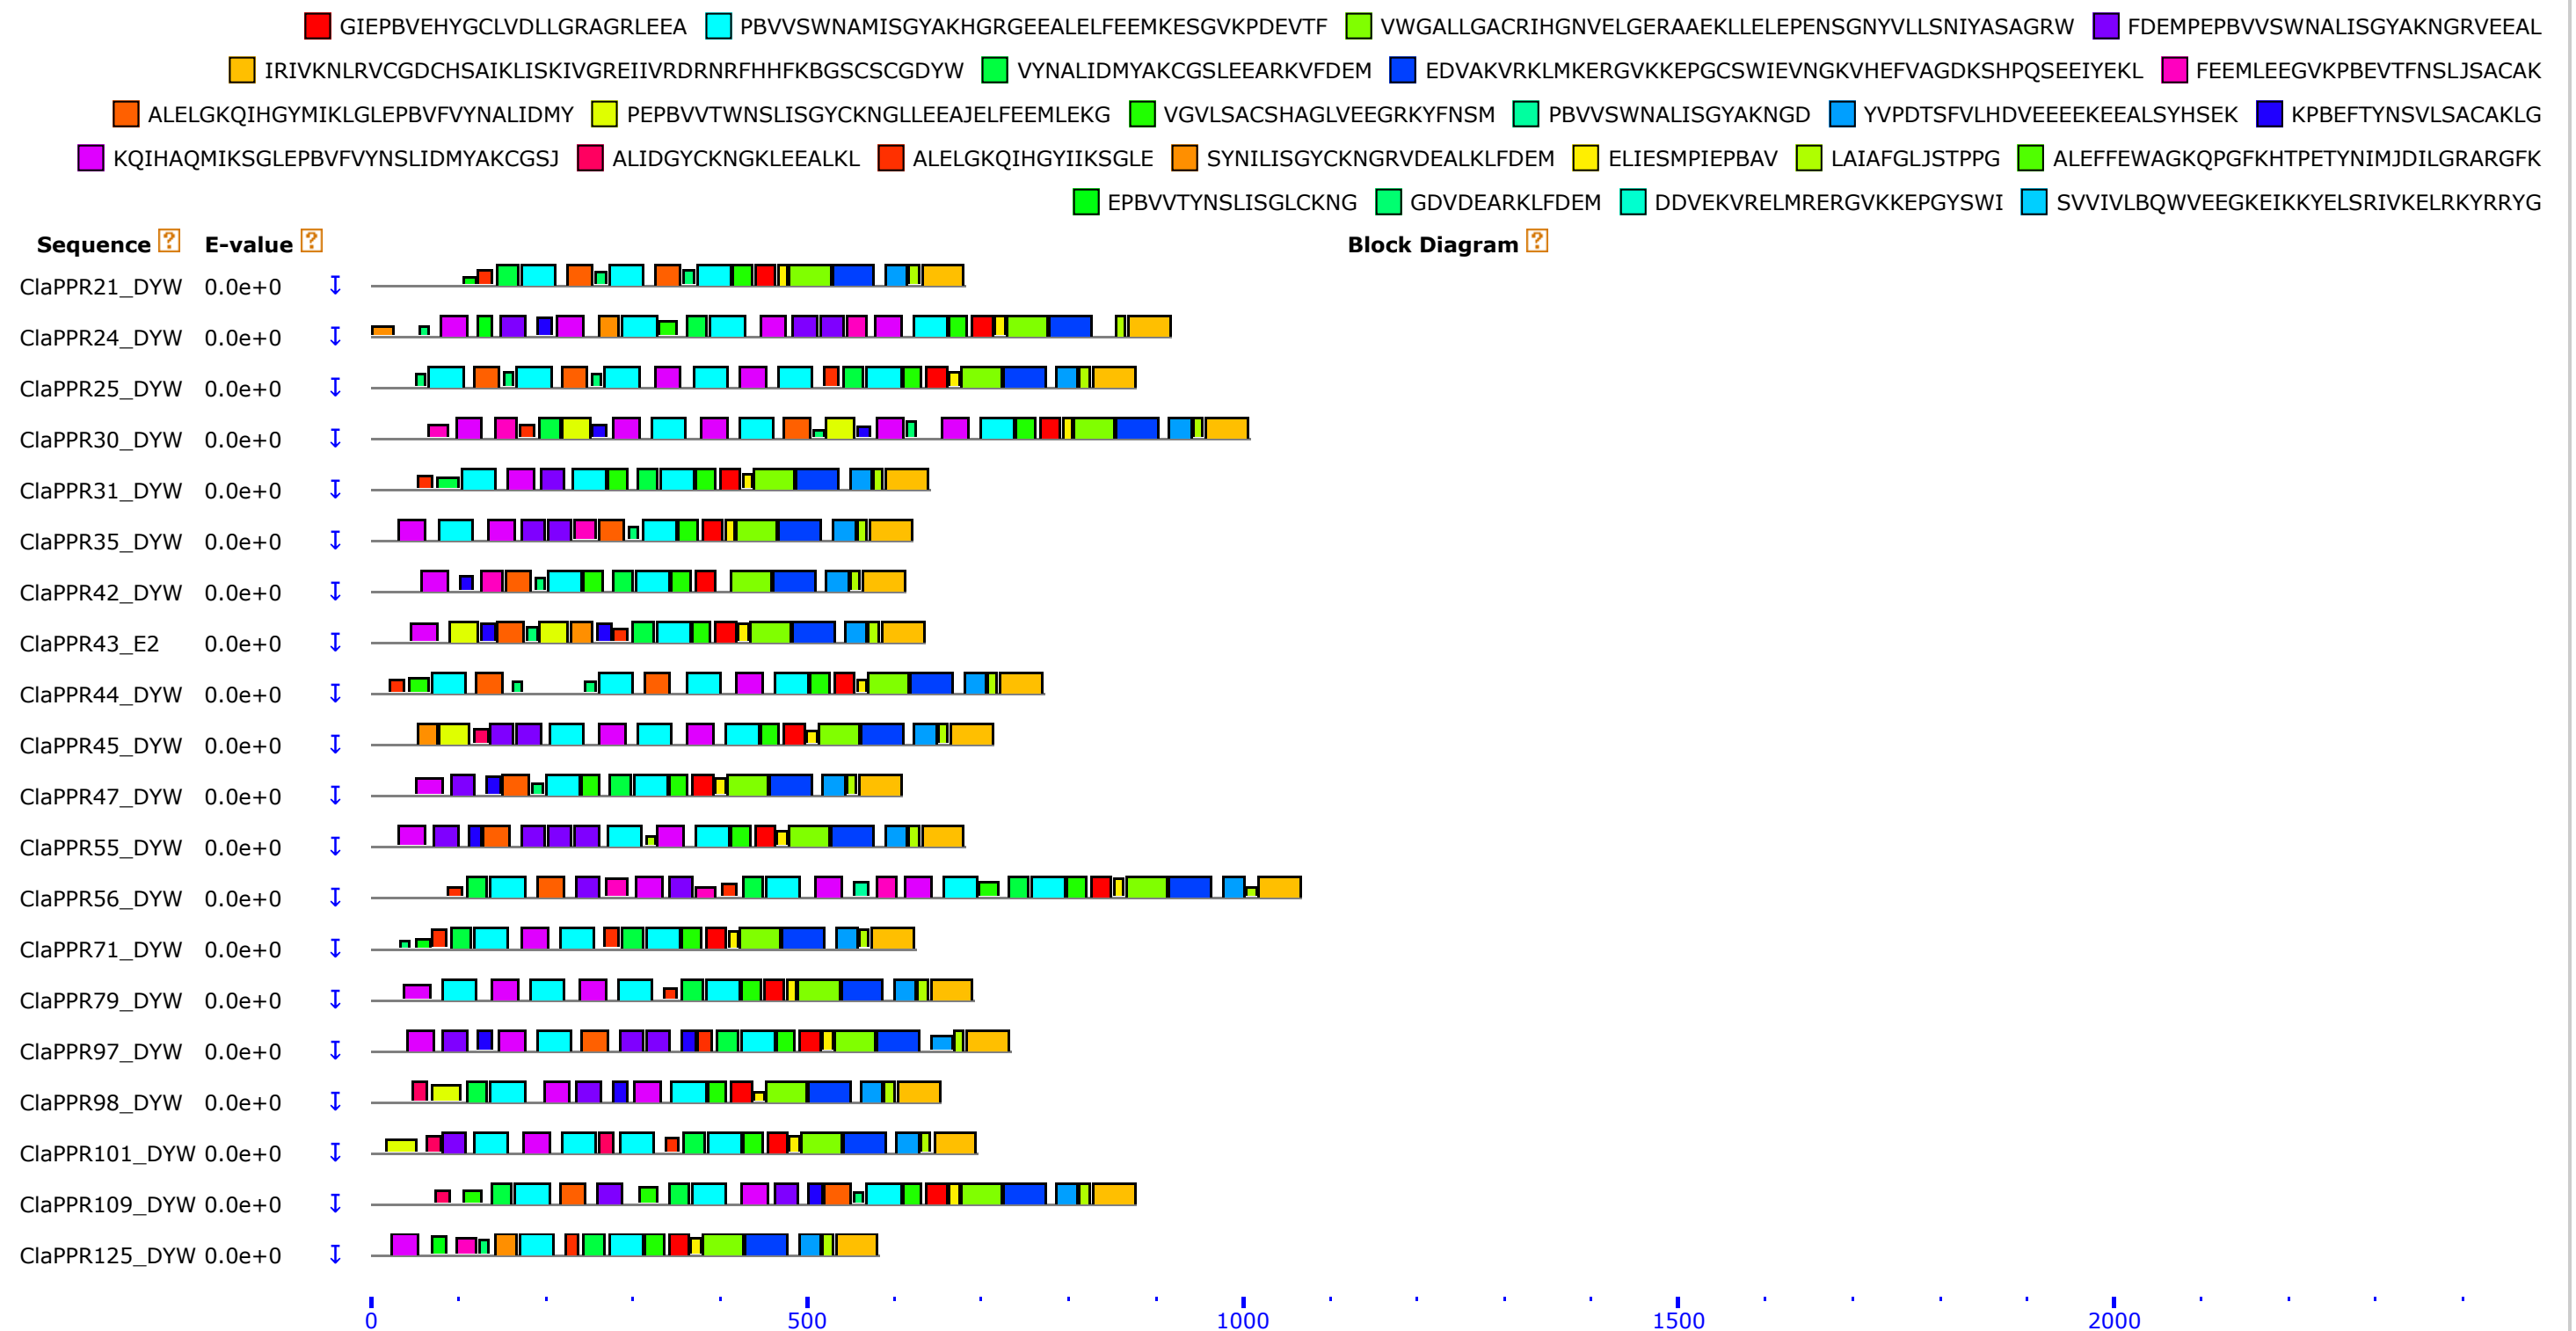

Sequence  E-value 

Block Diagram 

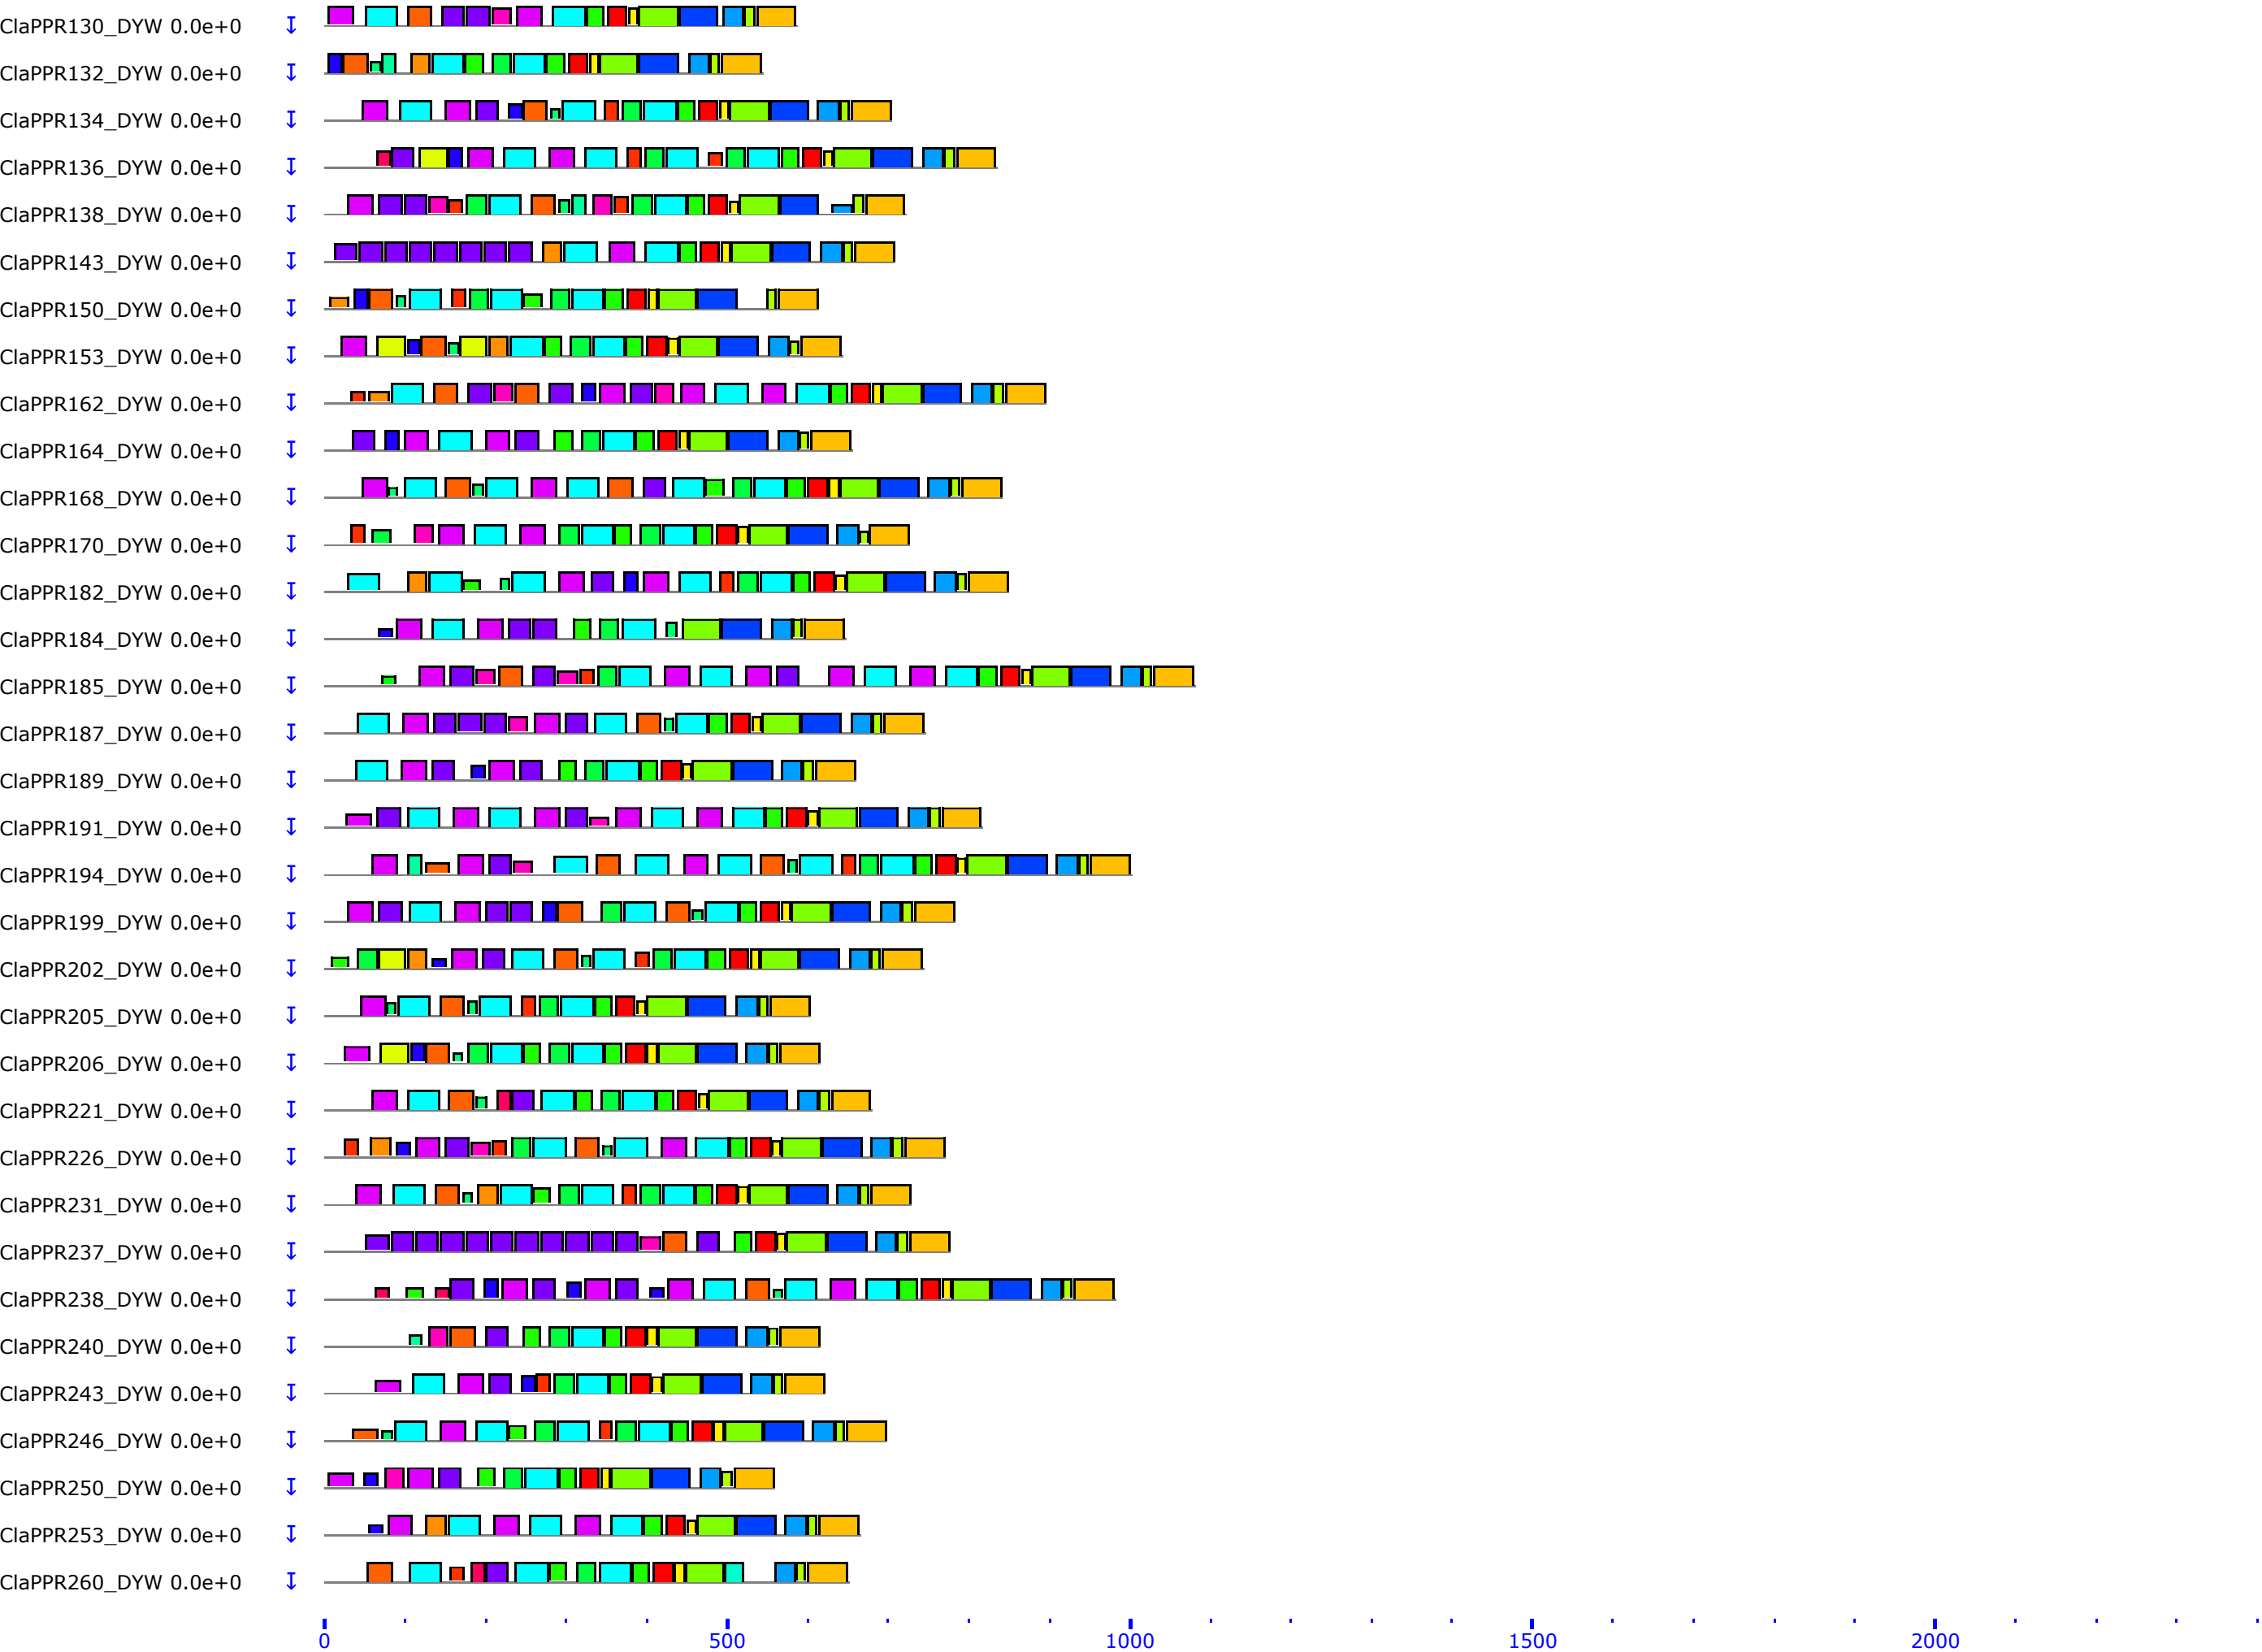

Sequence  E-value 

Block Diagram 

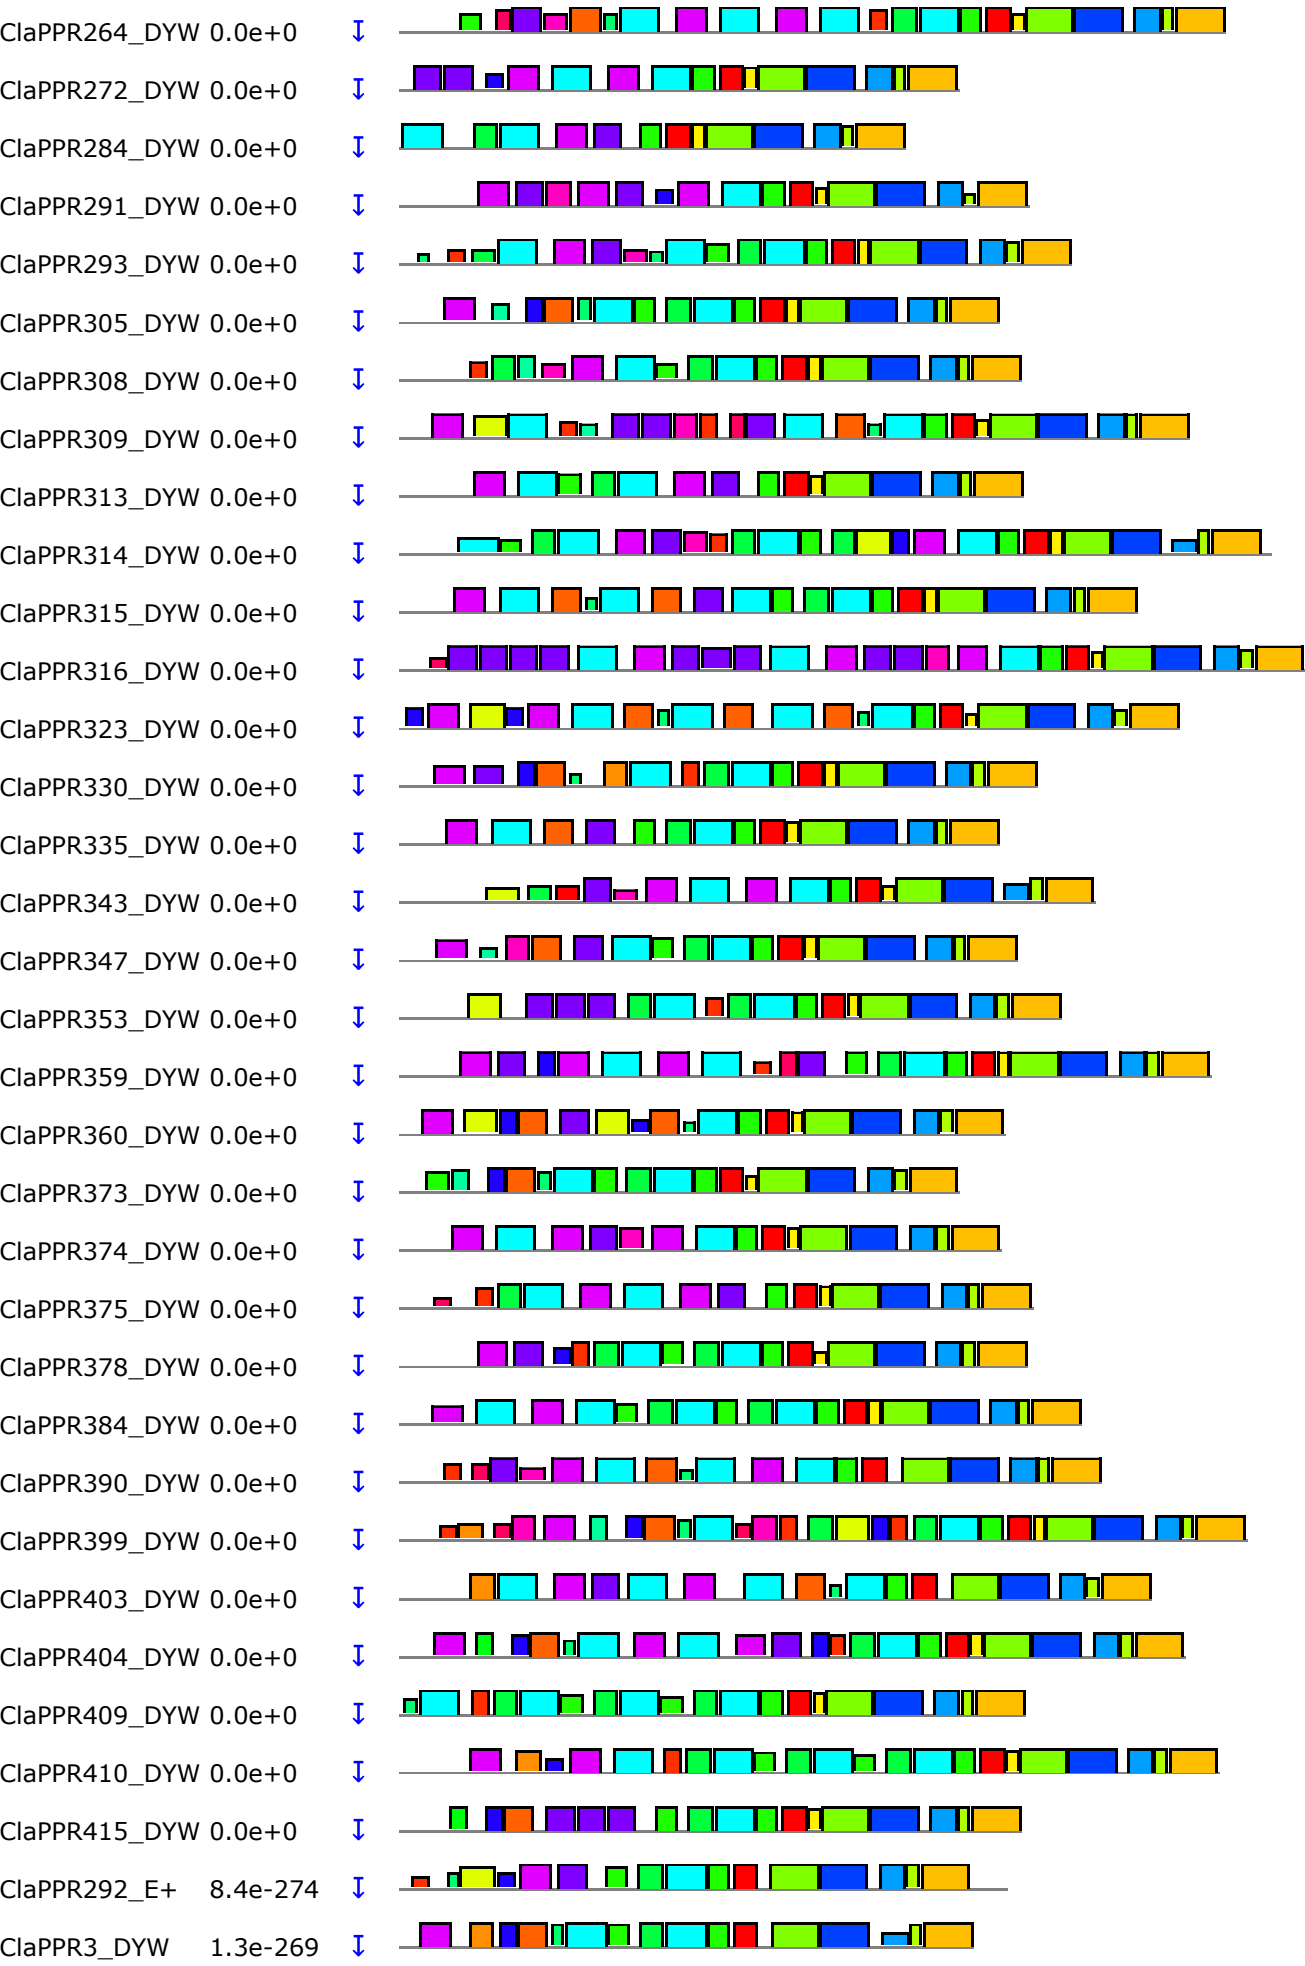

0 500 1000 1500 2000

Sequence  E-value 

Block Diagram 

|               |          |   |                                                                                      |
|---------------|----------|---|--------------------------------------------------------------------------------------|
| ClaPPR302_DYW | 1.3e-267 | ↓ |    |
| ClaPPR278_DYW | 6.2e-267 | ↓ |    |
| ClaPPR248_DYW | 1.7e-261 | ↓ |    |
| ClaPPR207_DYW | 8.6e-260 | ↓ |    |
| ClaPPR388_E+  | 1.5e-259 | ↓ |    |
| ClaPPR369_E+  | 8.6e-257 | ↓ |    |
| ClaPPR124_E2  | 2.1e-256 | ↓ |     |
| ClaPPR230_E2  | 2.5e-256 | ↓ |    |
| ClaPPR219_DYW | 5.9e-256 | ↓ |    |
| ClaPPR372_E2  | 1.2e-255 | ↓ |    |
| ClaPPR159_E2  | 1.6e-254 | ↓ |    |
| ClaPPR321_E2  | 9.3e-254 | ↓ |    |
| ClaPPR227_E2  | 2.9e-253 | ↓ |    |
| ClaPPR149_DYW | 3.3e-253 | ↓ |    |
| ClaPPR307_E+  | 1.1e-251 | ↓ |    |
| ClaPPR140_E2  | 5.4e-250 | ↓ |   |
| ClaPPR62_E+   | 3.2e-248 | ↓ |  |
| ClaPPR23_E+   | 4.4e-247 | ↓ |  |
| ClaPPR95_E2   | 9.2e-244 | ↓ |  |
| ClaPPR282_E2  | 1.6e-243 | ↓ |  |
| ClaPPR126_E2  | 4.8e-242 | ↓ |  |
| ClaPPR177_E2  | 5.4e-242 | ↓ |  |
| ClaPPR407_E2  | 2.2e-240 | ↓ |  |
| ClaPPR381_E2  | 8.2e-240 | ↓ |  |
| ClaPPR310_DYW | 3.0e-239 | ↓ |  |
| ClaPPR419_E2  | 3.6e-239 | ↓ |  |
| ClaPPR337_E2  | 4.9e-239 | ↓ |  |
| ClaPPR398_E+  | 1.2e-238 | ↓ |  |
| ClaPPR161_E2  | 3.7e-236 | ↓ |  |
| ClaPPR181_DYW | 5.3e-236 | ↓ |  |
| ClaPPR86_E+   | 1.2e-235 | ↓ |  |
| ClaPPR251_E2  | 3.9e-235 | ↓ |  |
| ClaPPR383_E2  | 3.0e-234 | ↓ |  |
| ClaPPR166_E2  | 9.2e-234 | ↓ |  |

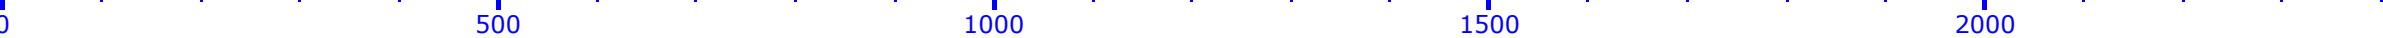

Block Diagram ?

| Sequence ?    | E-value ? |   |
|---------------|-----------|---|
| ClaPPR146_E2  | 2.8e-233  | ↓ |
| ClaPPR96_E2   | 3.0e-233  | ↓ |
| ClaPPR178_E2  | 3.2e-233  | ↓ |
| ClaPPR94_E2   | 8.2e-233  | ↓ |
| ClaPPR167_DYW | 1.1e-232  | ↓ |
| ClaPPR274_E2  | 1.8e-232  | ↓ |
| ClaPPR171_E2  | 3.7e-232  | ↓ |
| ClaPPR286_E2  | 5.4e-232  | ↓ |
| ClaPPR147_E2  | 2.8e-231  | ↓ |
| ClaPPR262_E2  | 8.1e-231  | ↓ |
| ClaPPR60_E2   | 8.5e-229  | ↓ |
| ClaPPR229_E2  | 3.8e-228  | ↓ |
| ClaPPR281_E2  | 3.8e-227  | ↓ |
| ClaPPR108_E2  | 4.2e-227  | ↓ |
| ClaPPR77_E+   | 3.4e-226  | ↓ |
| ClaPPR269_E2  | 6.2e-226  | ↓ |
| ClaPPR271_E2  | 1.9e-225  | ↓ |
| ClaPPR115_E2  | 3.0e-225  | ↓ |
| ClaPPR249_E2  | 7.2e-225  | ↓ |
| ClaPPR133_E2  | 1.2e-223  | ↓ |
| ClaPPR1_E2    | 1.8e-223  | ↓ |
| ClaPPR52_E2   | 2.6e-223  | ↓ |
| ClaPPR88_E2   | 2.5e-222  | ↓ |
| ClaPPR362_DYW | 1.3e-220  | ↓ |
| ClaPPR365_E2  | 2.7e-220  | ↓ |
| ClaPPR306_E2  | 6.4e-219  | ↓ |
| ClaPPR351_E2  | 8.1e-219  | ↓ |
| ClaPPR74_E2   | 3.4e-217  | ↓ |
| ClaPPR379_E2  | 5.1e-217  | ↓ |
| ClaPPR342_E2  | 1.3e-216  | ↓ |
| ClaPPR128_E2  | 3.6e-216  | ↓ |
| ClaPPR389_E2  | 1.6e-215  | ↓ |
| ClaPPR59_E2   | 7.6e-215  | ↓ |
| ClaPPR220_E2  | 2.3e-214  | ↓ |

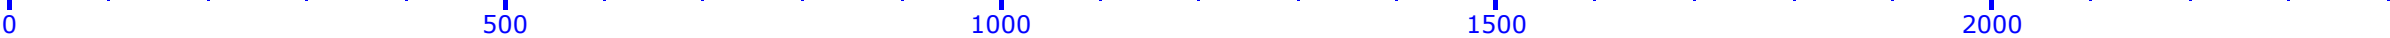

Block Diagram ?

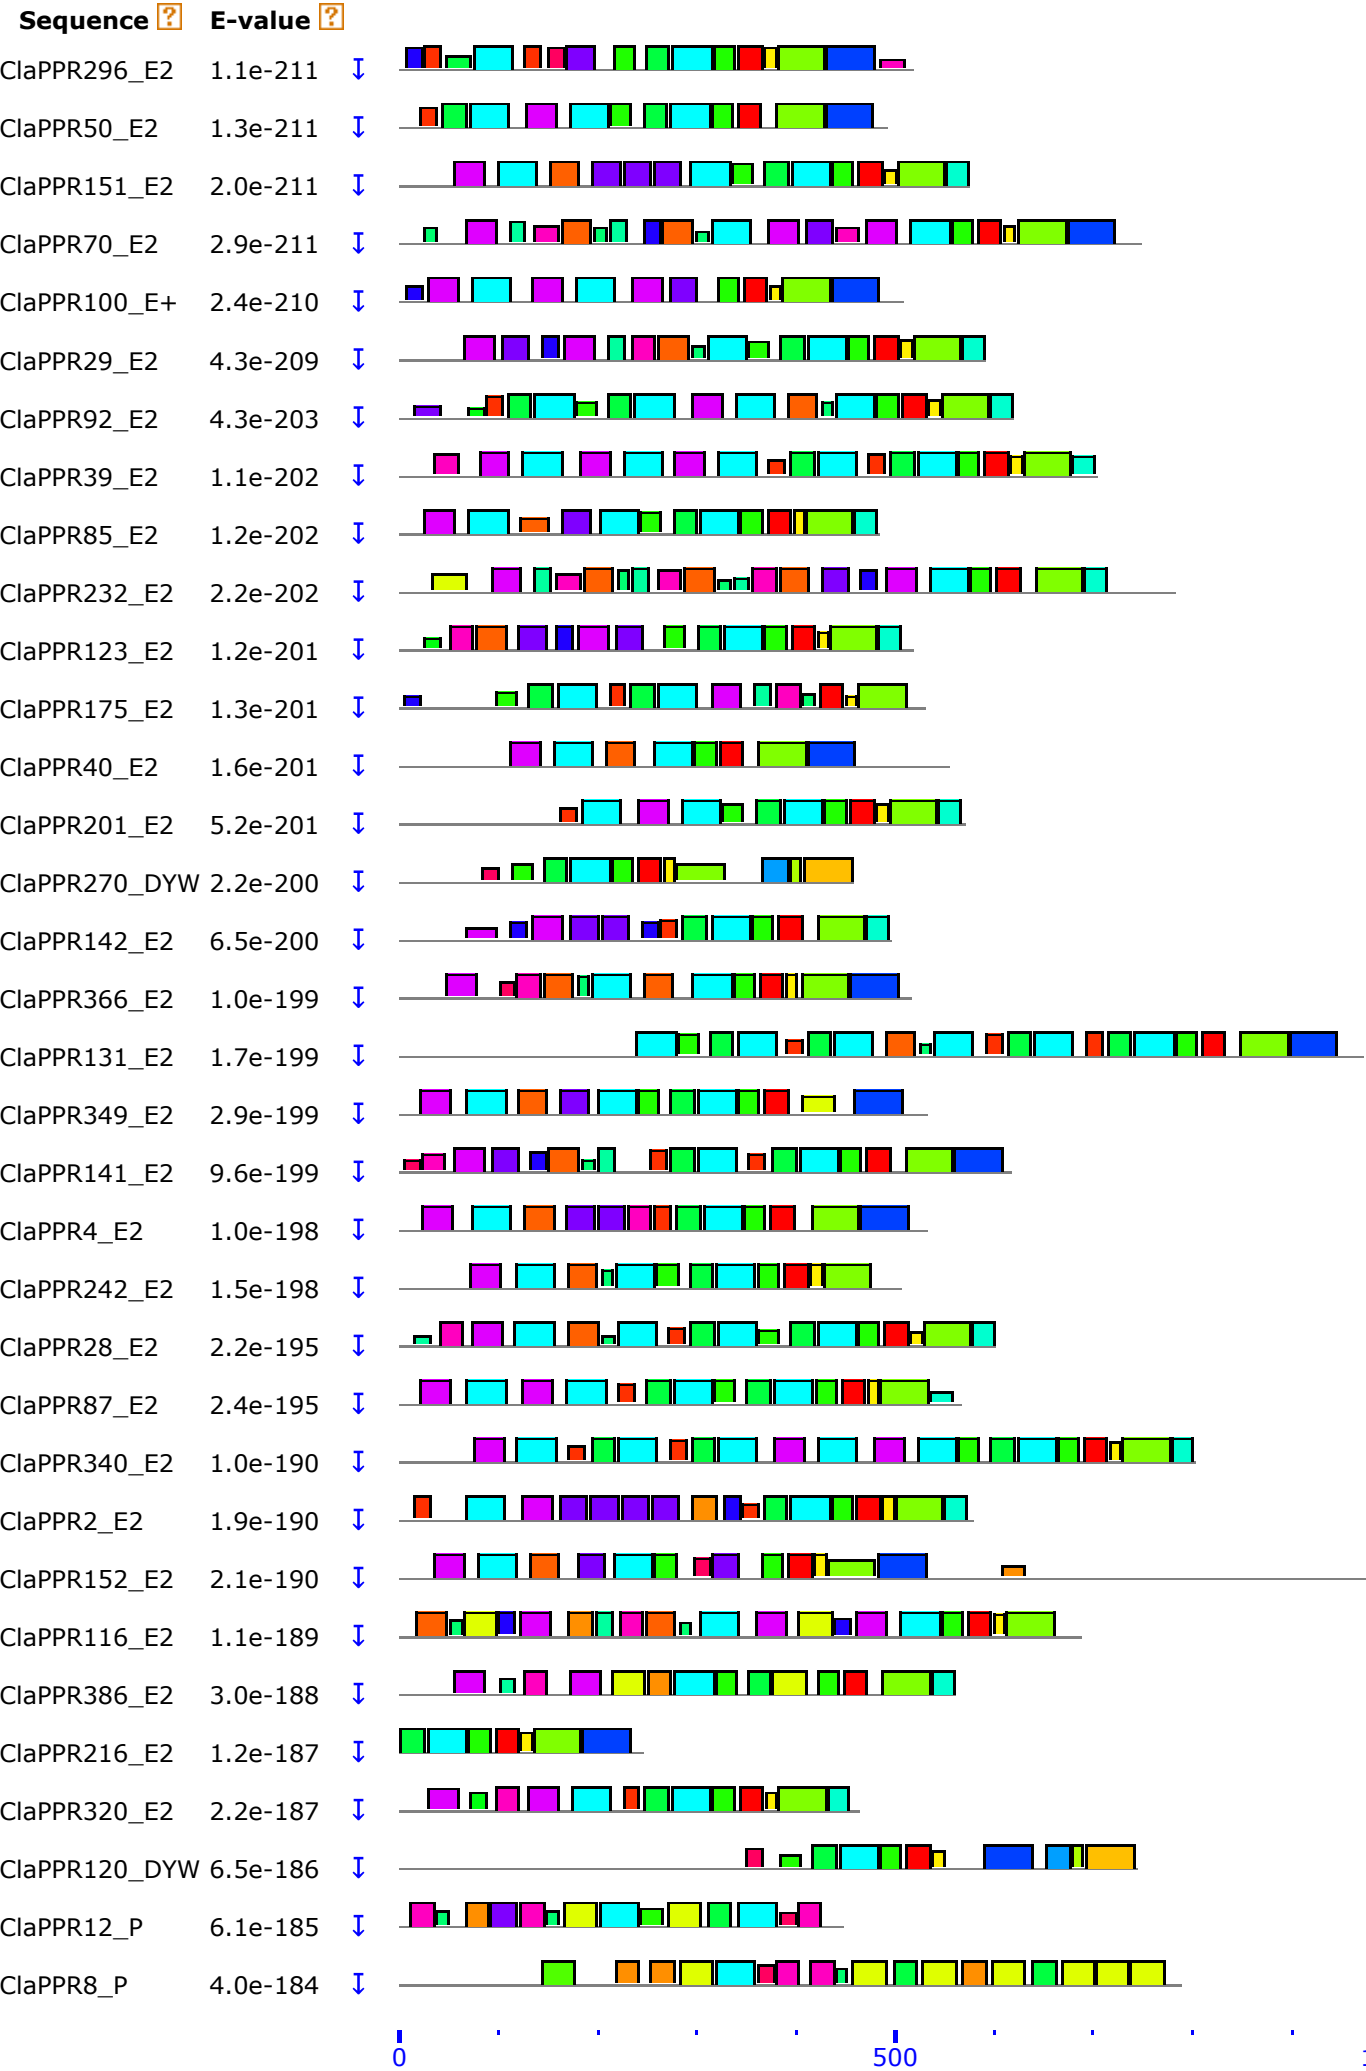

Block Diagram ?

Sequence ? E-value ?

|               |          |   |                                                                                      |
|---------------|----------|---|--------------------------------------------------------------------------------------|
| ClaPPR89_E2   | 2.8e-182 | ↓ |     |
| ClaPPR139_E2  | 3.9e-182 | ↓ |    |
| ClaPPR49_E2   | 9.8e-182 | ↓ |     |
| ClaPPR214_E2  | 3.7e-181 | ↓ |    |
| ClaPPR259_E2  | 5.0e-181 | ↓ |    |
| ClaPPR110_E2  | 4.6e-179 | ↓ |    |
| ClaPPR127_E2  | 1.3e-178 | ↓ |     |
| ClaPPR73_E2   | 2.9e-178 | ↓ |    |
| ClaPPR354_E2  | 1.3e-177 | ↓ |    |
| ClaPPR290_E2  | 5.8e-177 | ↓ |     |
| ClaPPR188_PLS | 1.2e-176 | ↓ |     |
| ClaPPR64_DYW  | 4.5e-176 | ↓ |    |
| ClaPPR395_E2  | 1.0e-174 | ↓ |     |
| ClaPPR113_E1  | 6.1e-173 | ↓ |    |
| ClaPPR54_E2   | 2.2e-172 | ↓ |     |
| ClaPPR22_E1   | 1.2e-171 | ↓ |     |
| ClaPPR245_E2  | 4.7e-171 | ↓ |   |
| ClaPPR145_P   | 2.9e-169 | ↓ |  |
| ClaPPR285_P   | 1.6e-168 | ↓ |  |
| ClaPPR312_E1  | 3.0e-168 | ↓ |  |
| ClaPPR84_P    | 9.2e-168 | ↓ |  |
| ClaPPR51_P    | 7.8e-166 | ↓ |  |
| ClaPPR186_P   | 8.5e-166 | ↓ |  |
| ClaPPR81_E2   | 1.6e-162 | ↓ |  |
| ClaPPR90_PLS  | 1.6e-161 | ↓ |  |
| ClaPPR37_E2   | 2.0e-161 | ↓ |  |
| ClaPPR198_P   | 9.7e-160 | ↓ |  |
| ClaPPR17_P    | 7.8e-159 | ↓ |  |
| ClaPPR218_P   | 1.6e-157 | ↓ |  |
| ClaPPR11_P    | 2.6e-157 | ↓ |  |
| ClaPPR401_PLS | 3.3e-157 | ↓ |  |
| ClaPPR416_P   | 3.3e-157 | ↓ |   |
| ClaPPR63_P    | 6.7e-157 | ↓ |  |
| ClaPPR288_PLS | 2.3e-156 | ↓ |  |

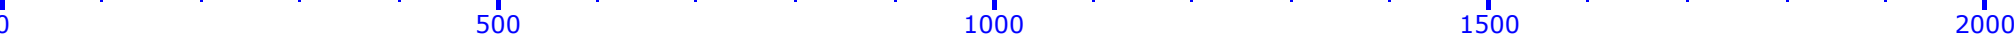

Sequence  E-value 

Block Diagram 

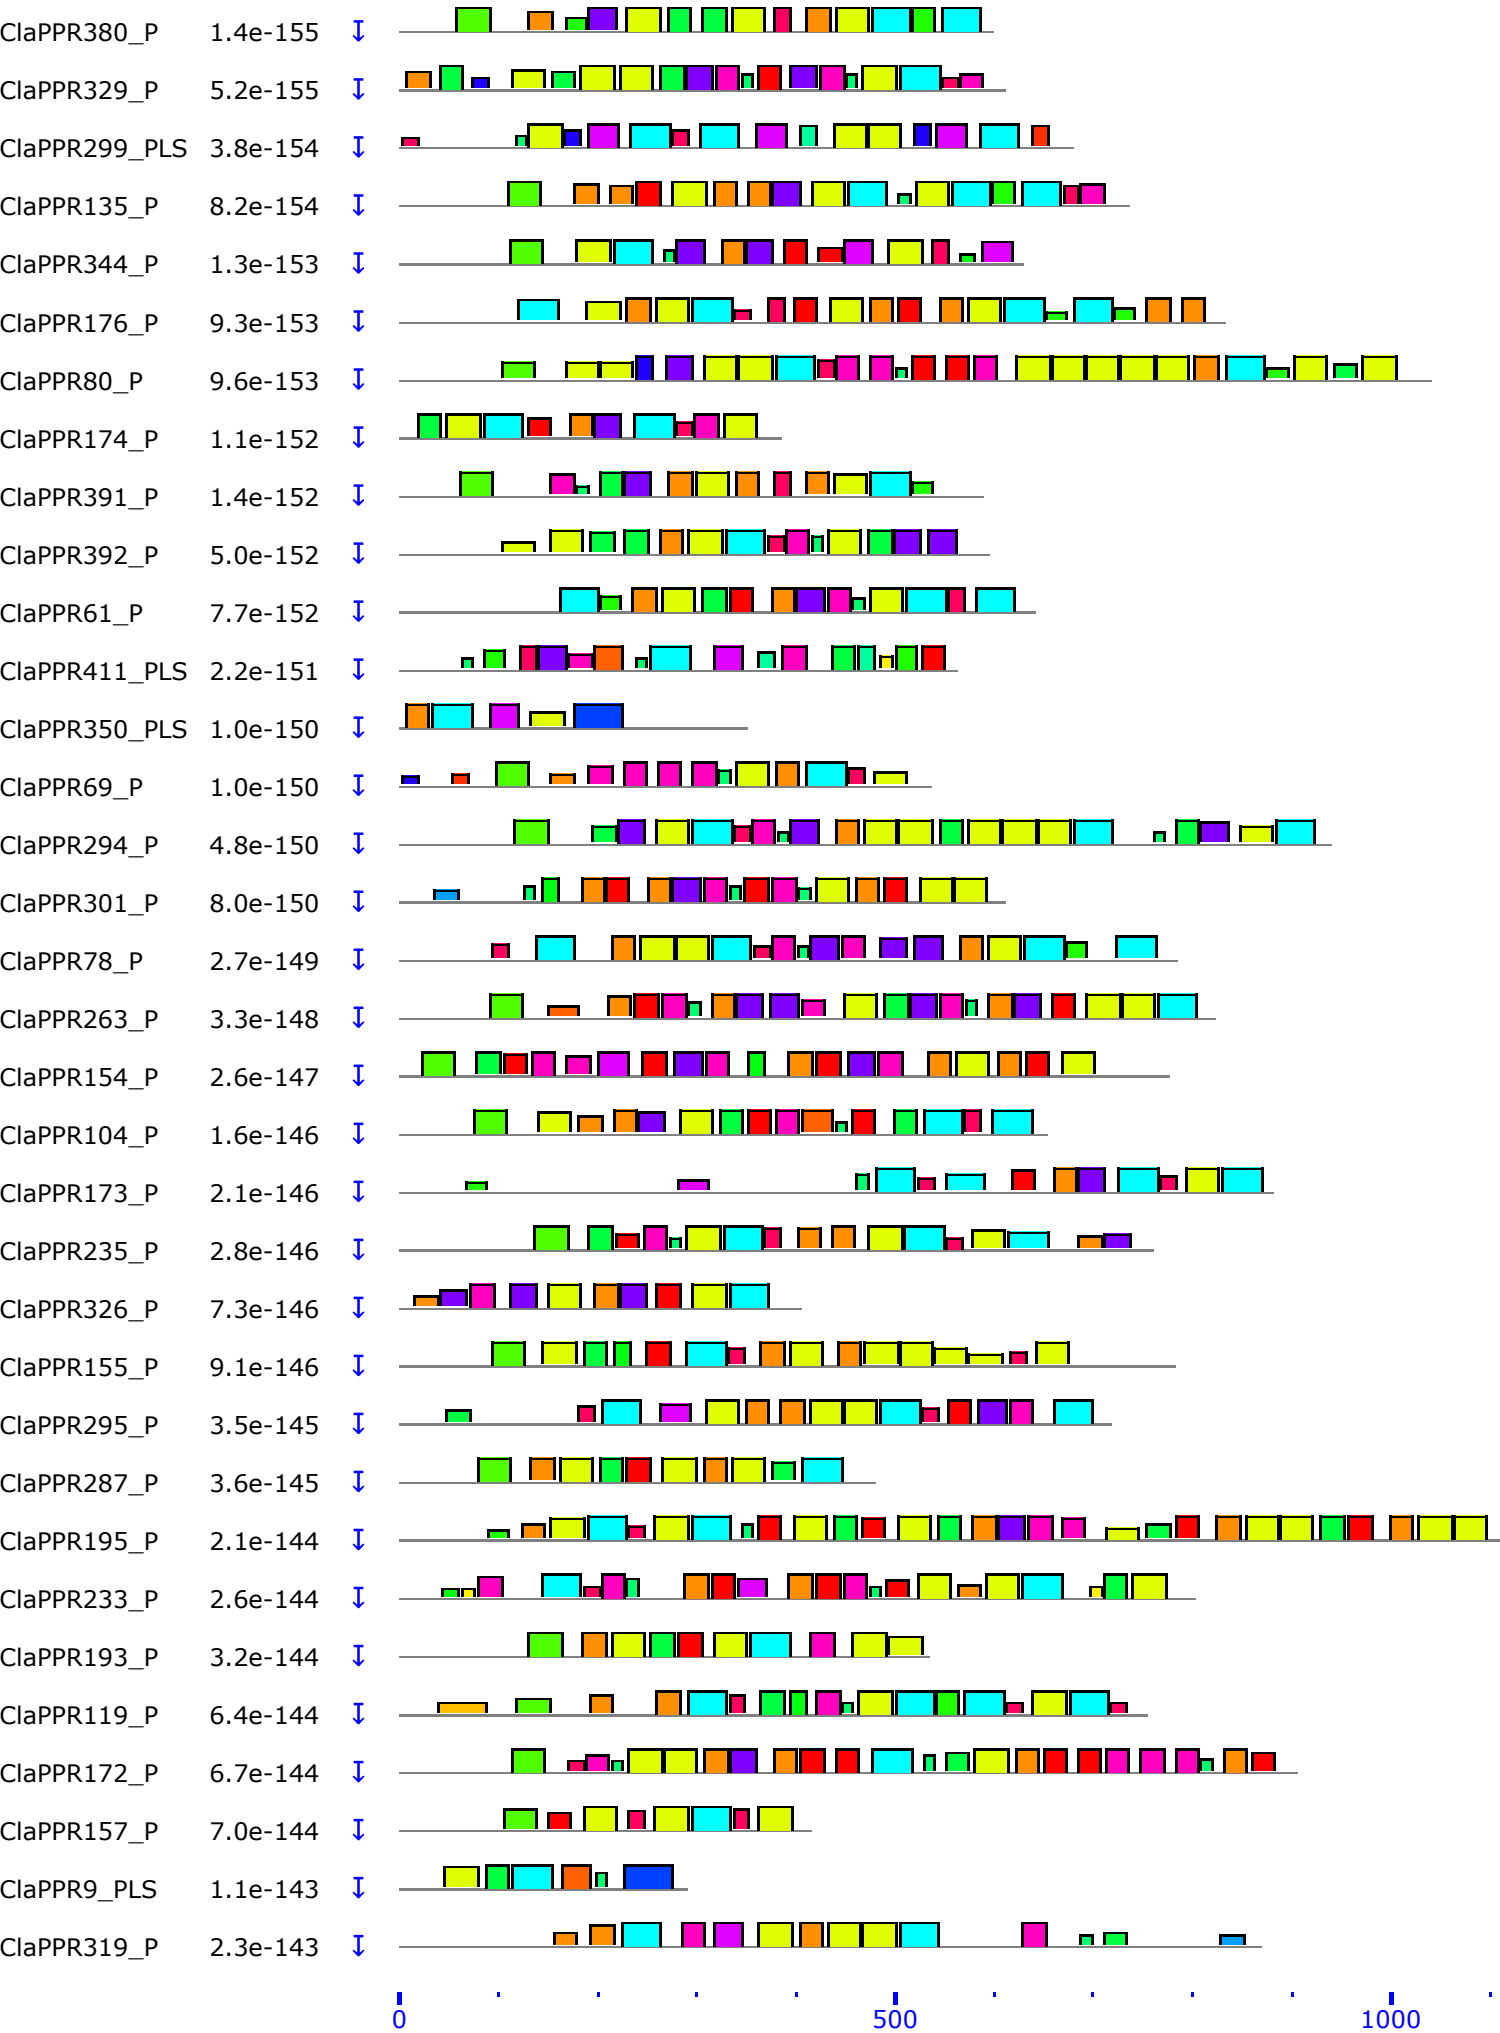



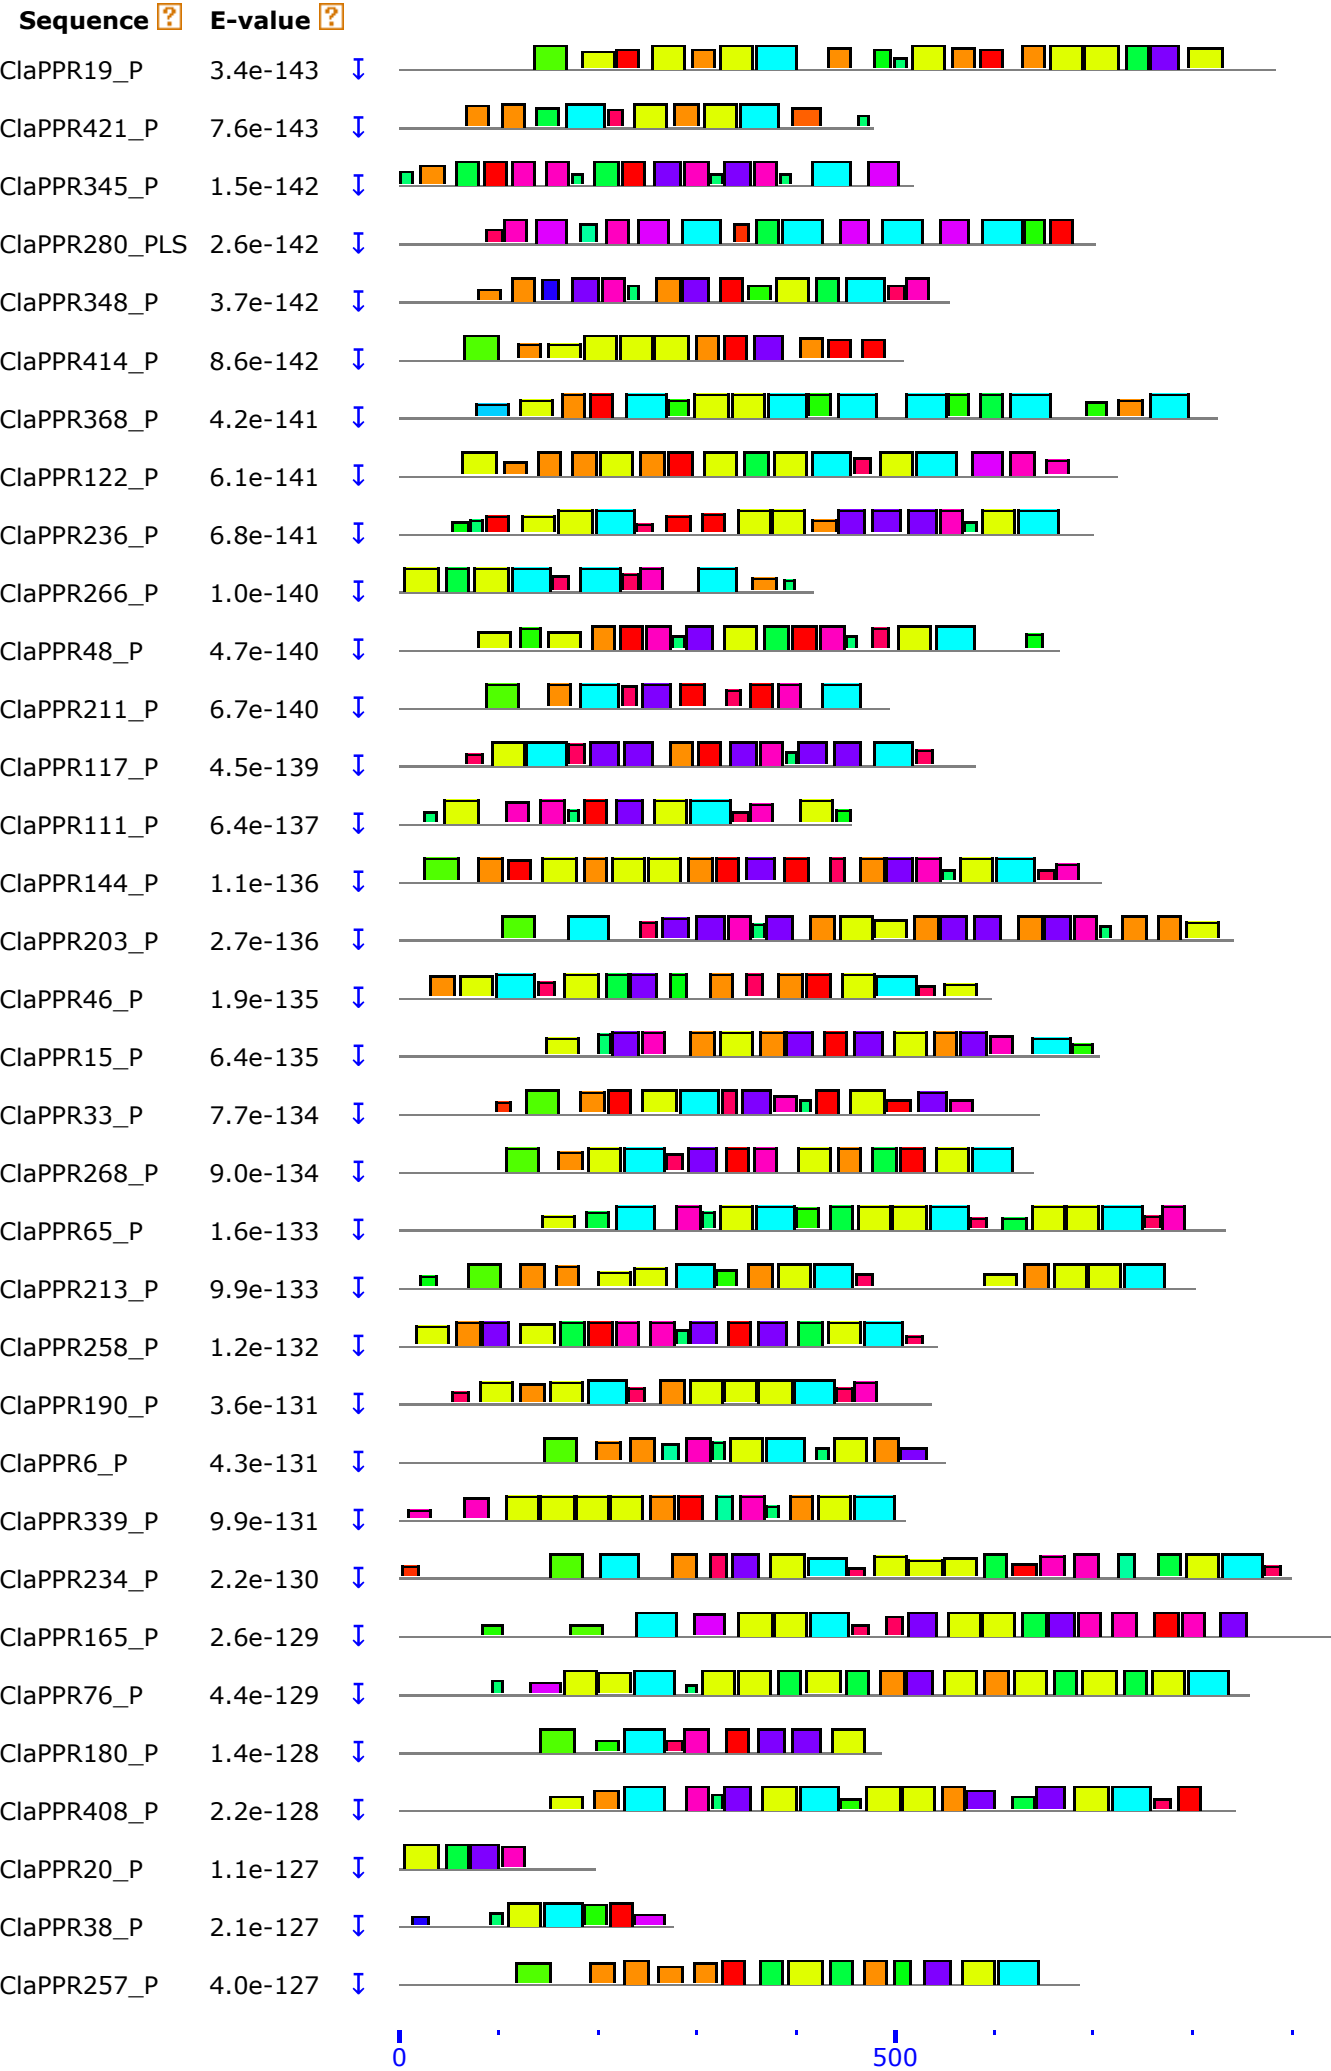

Block Diagram ?

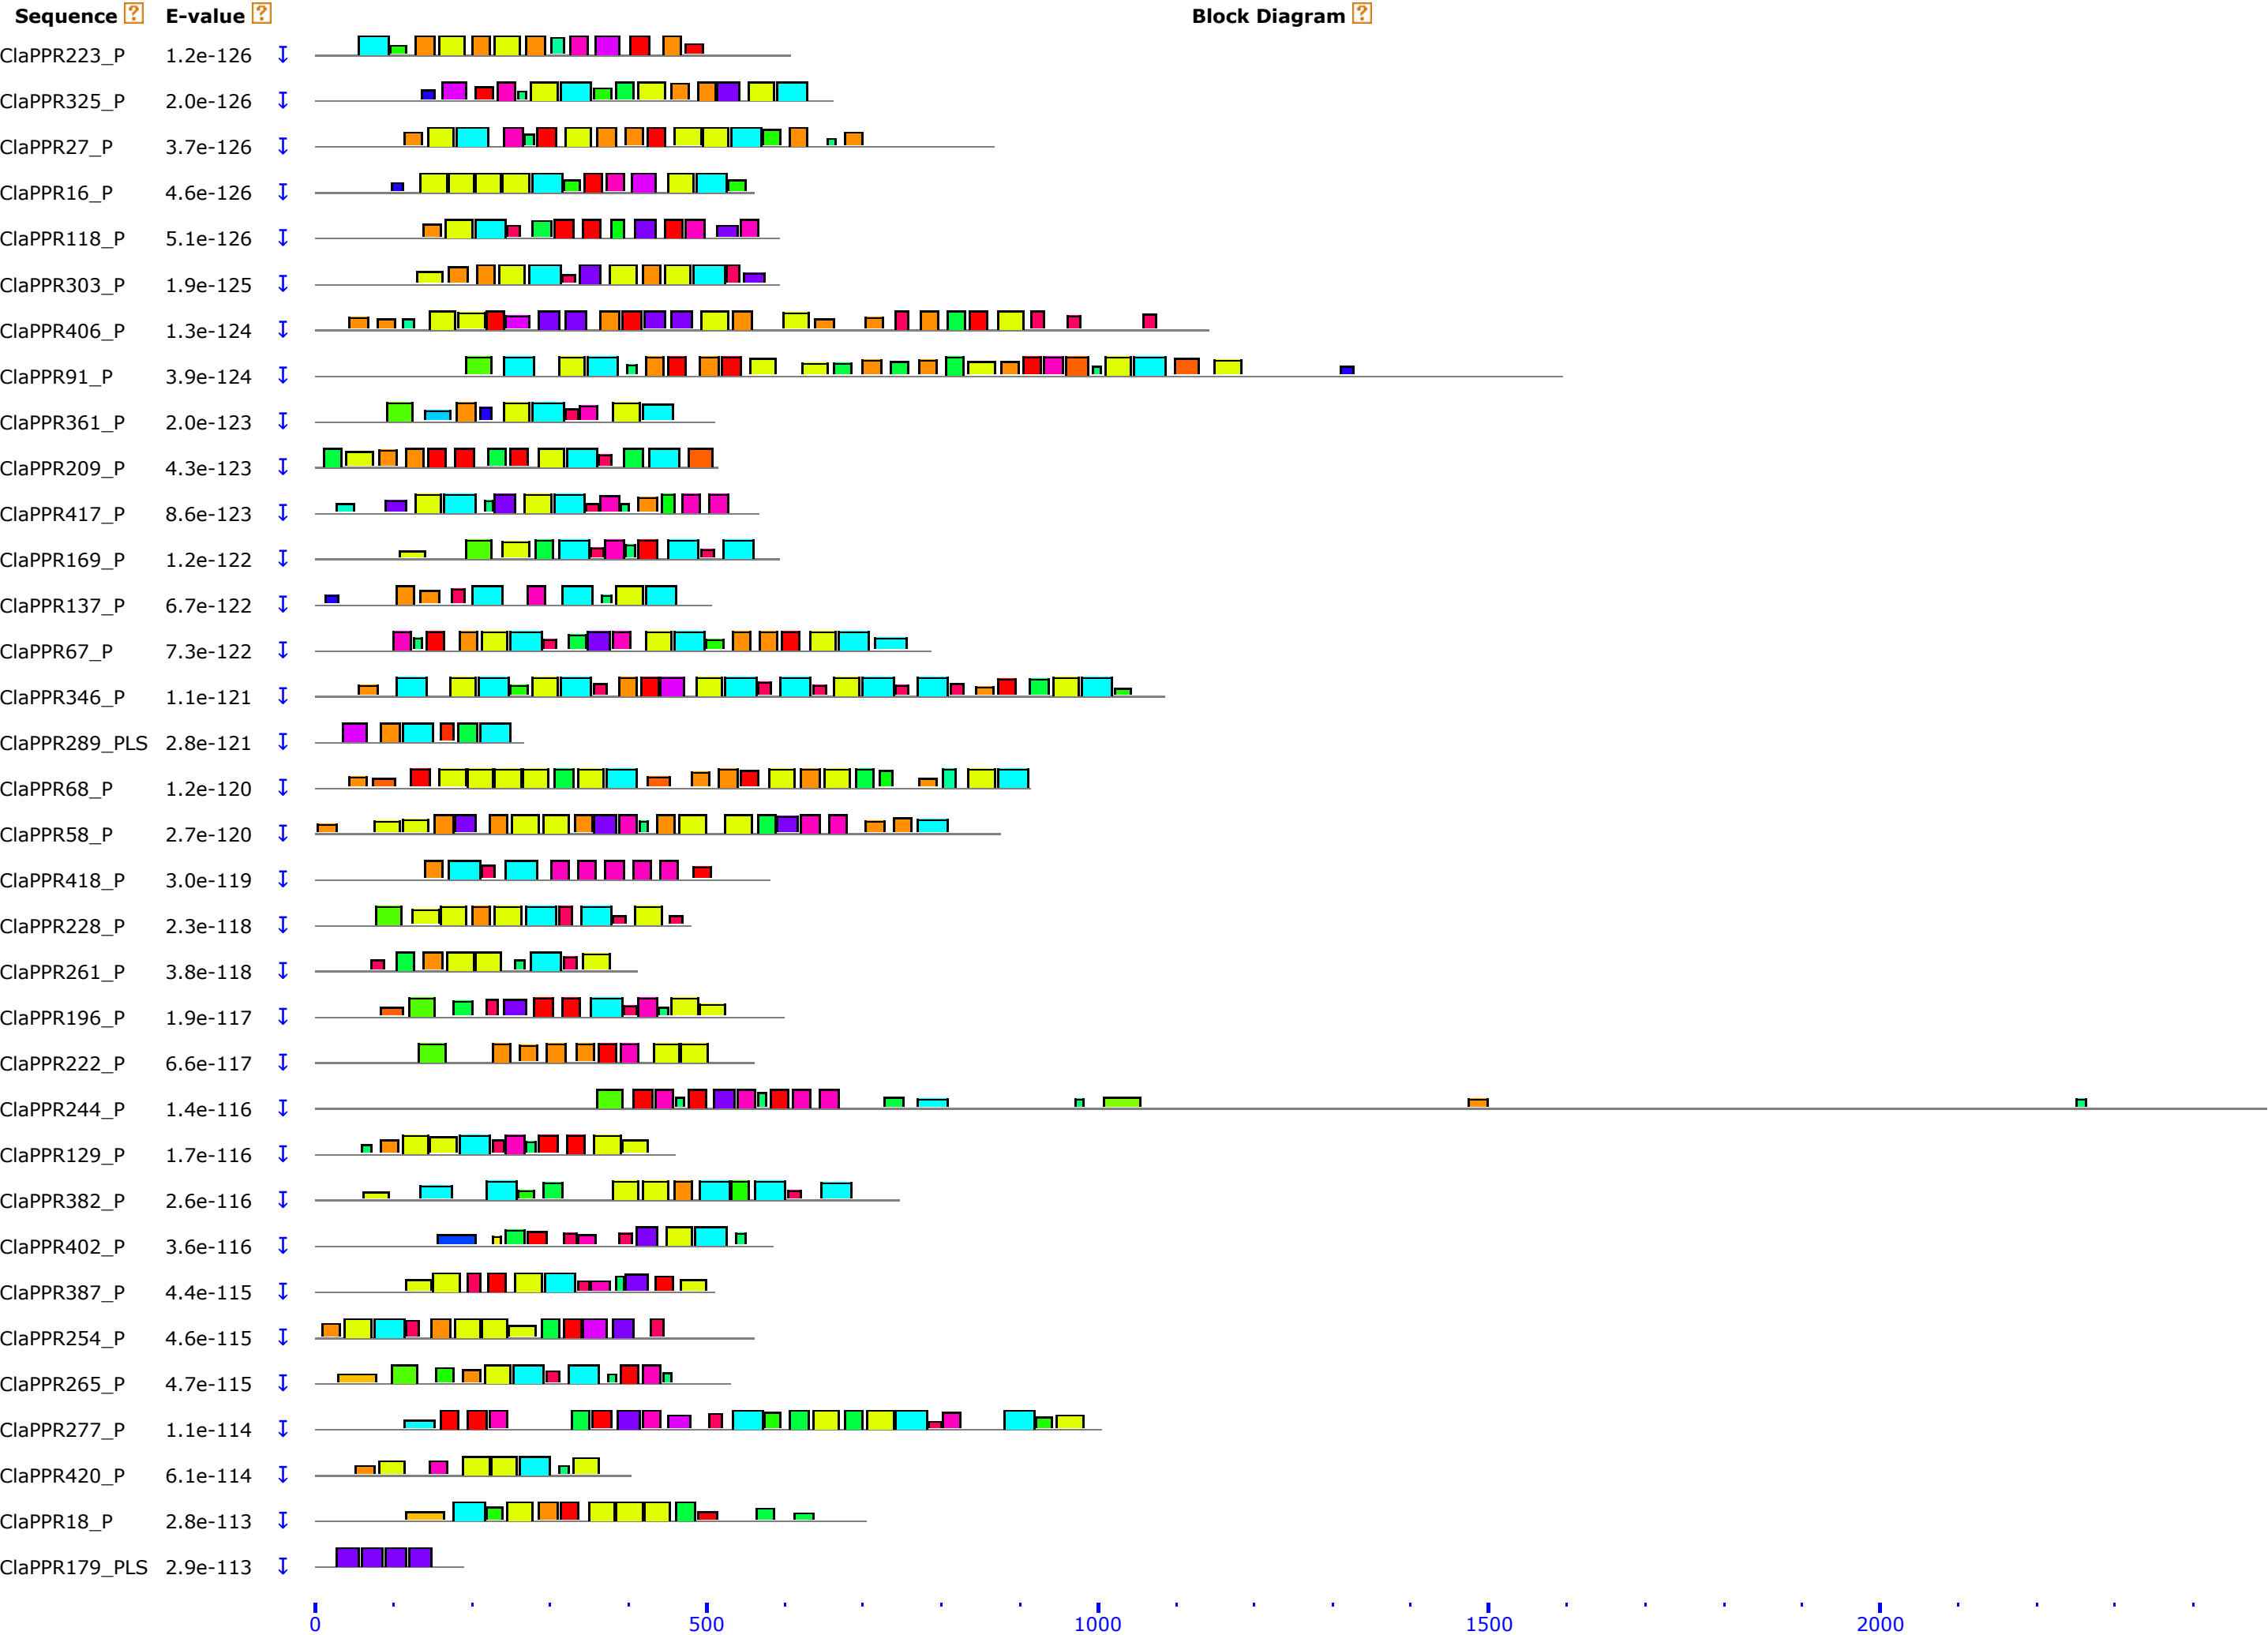

Sequence ? E-value ?

Block Diagram ?

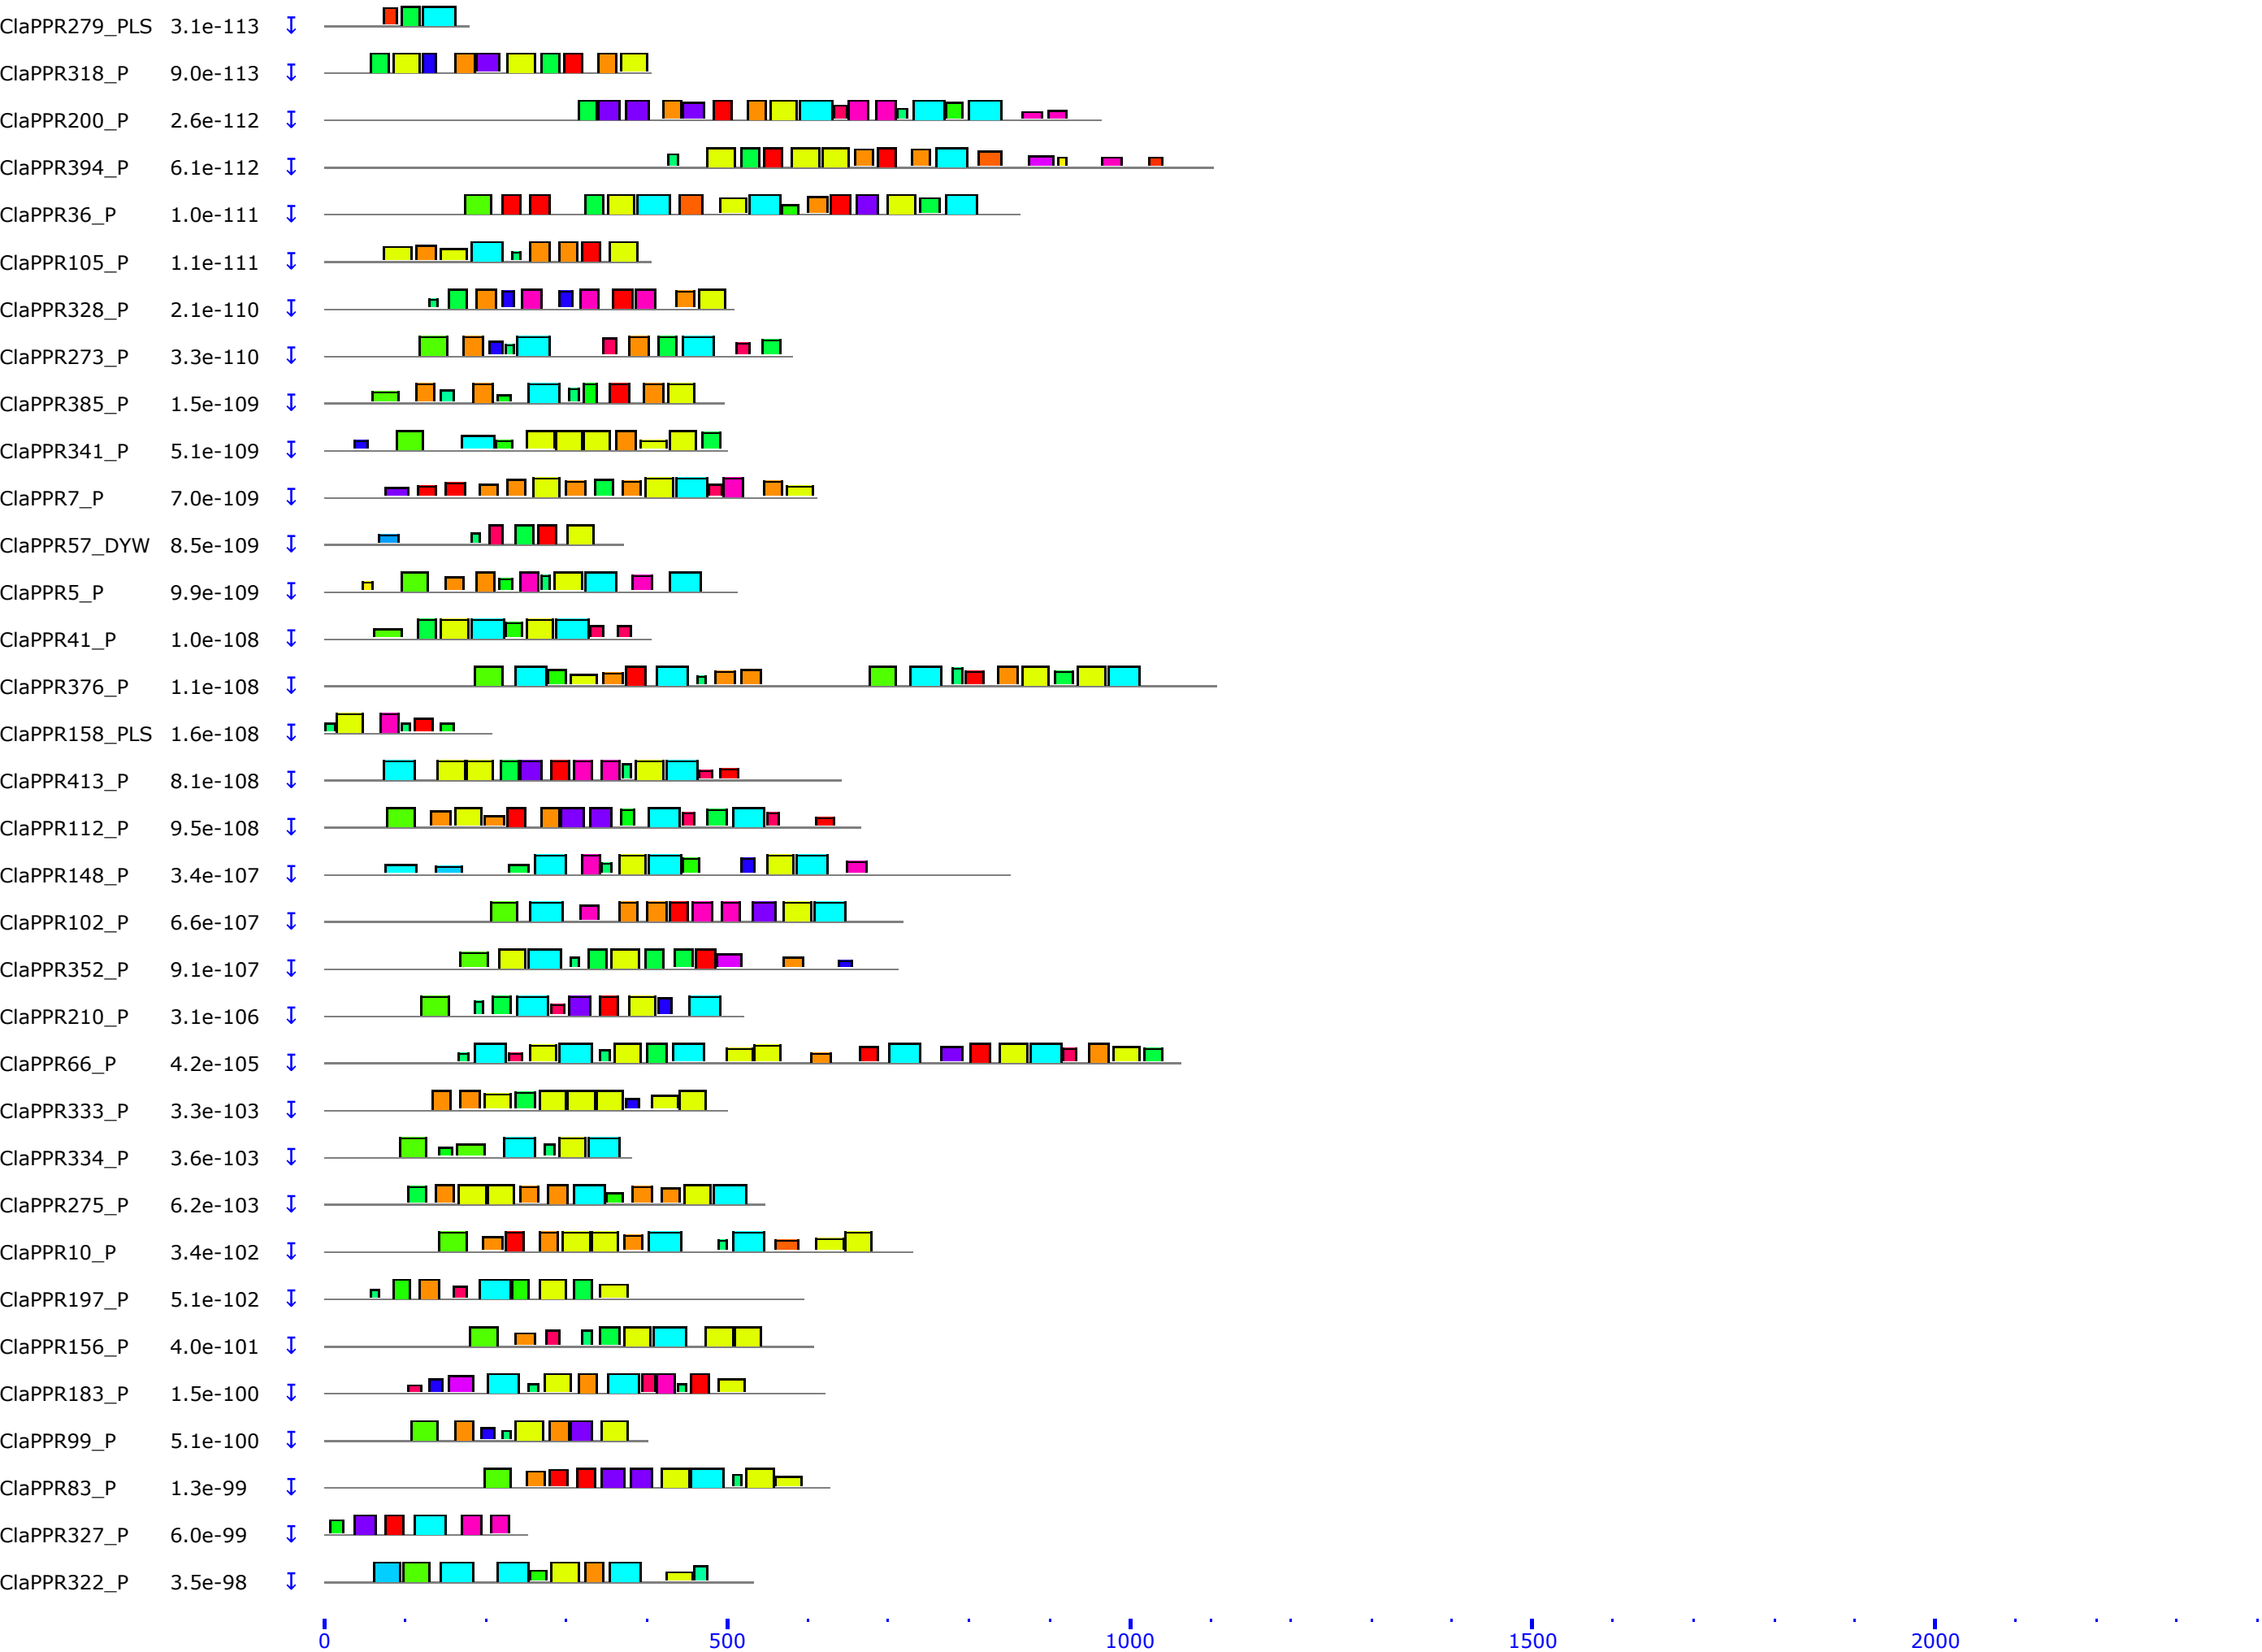

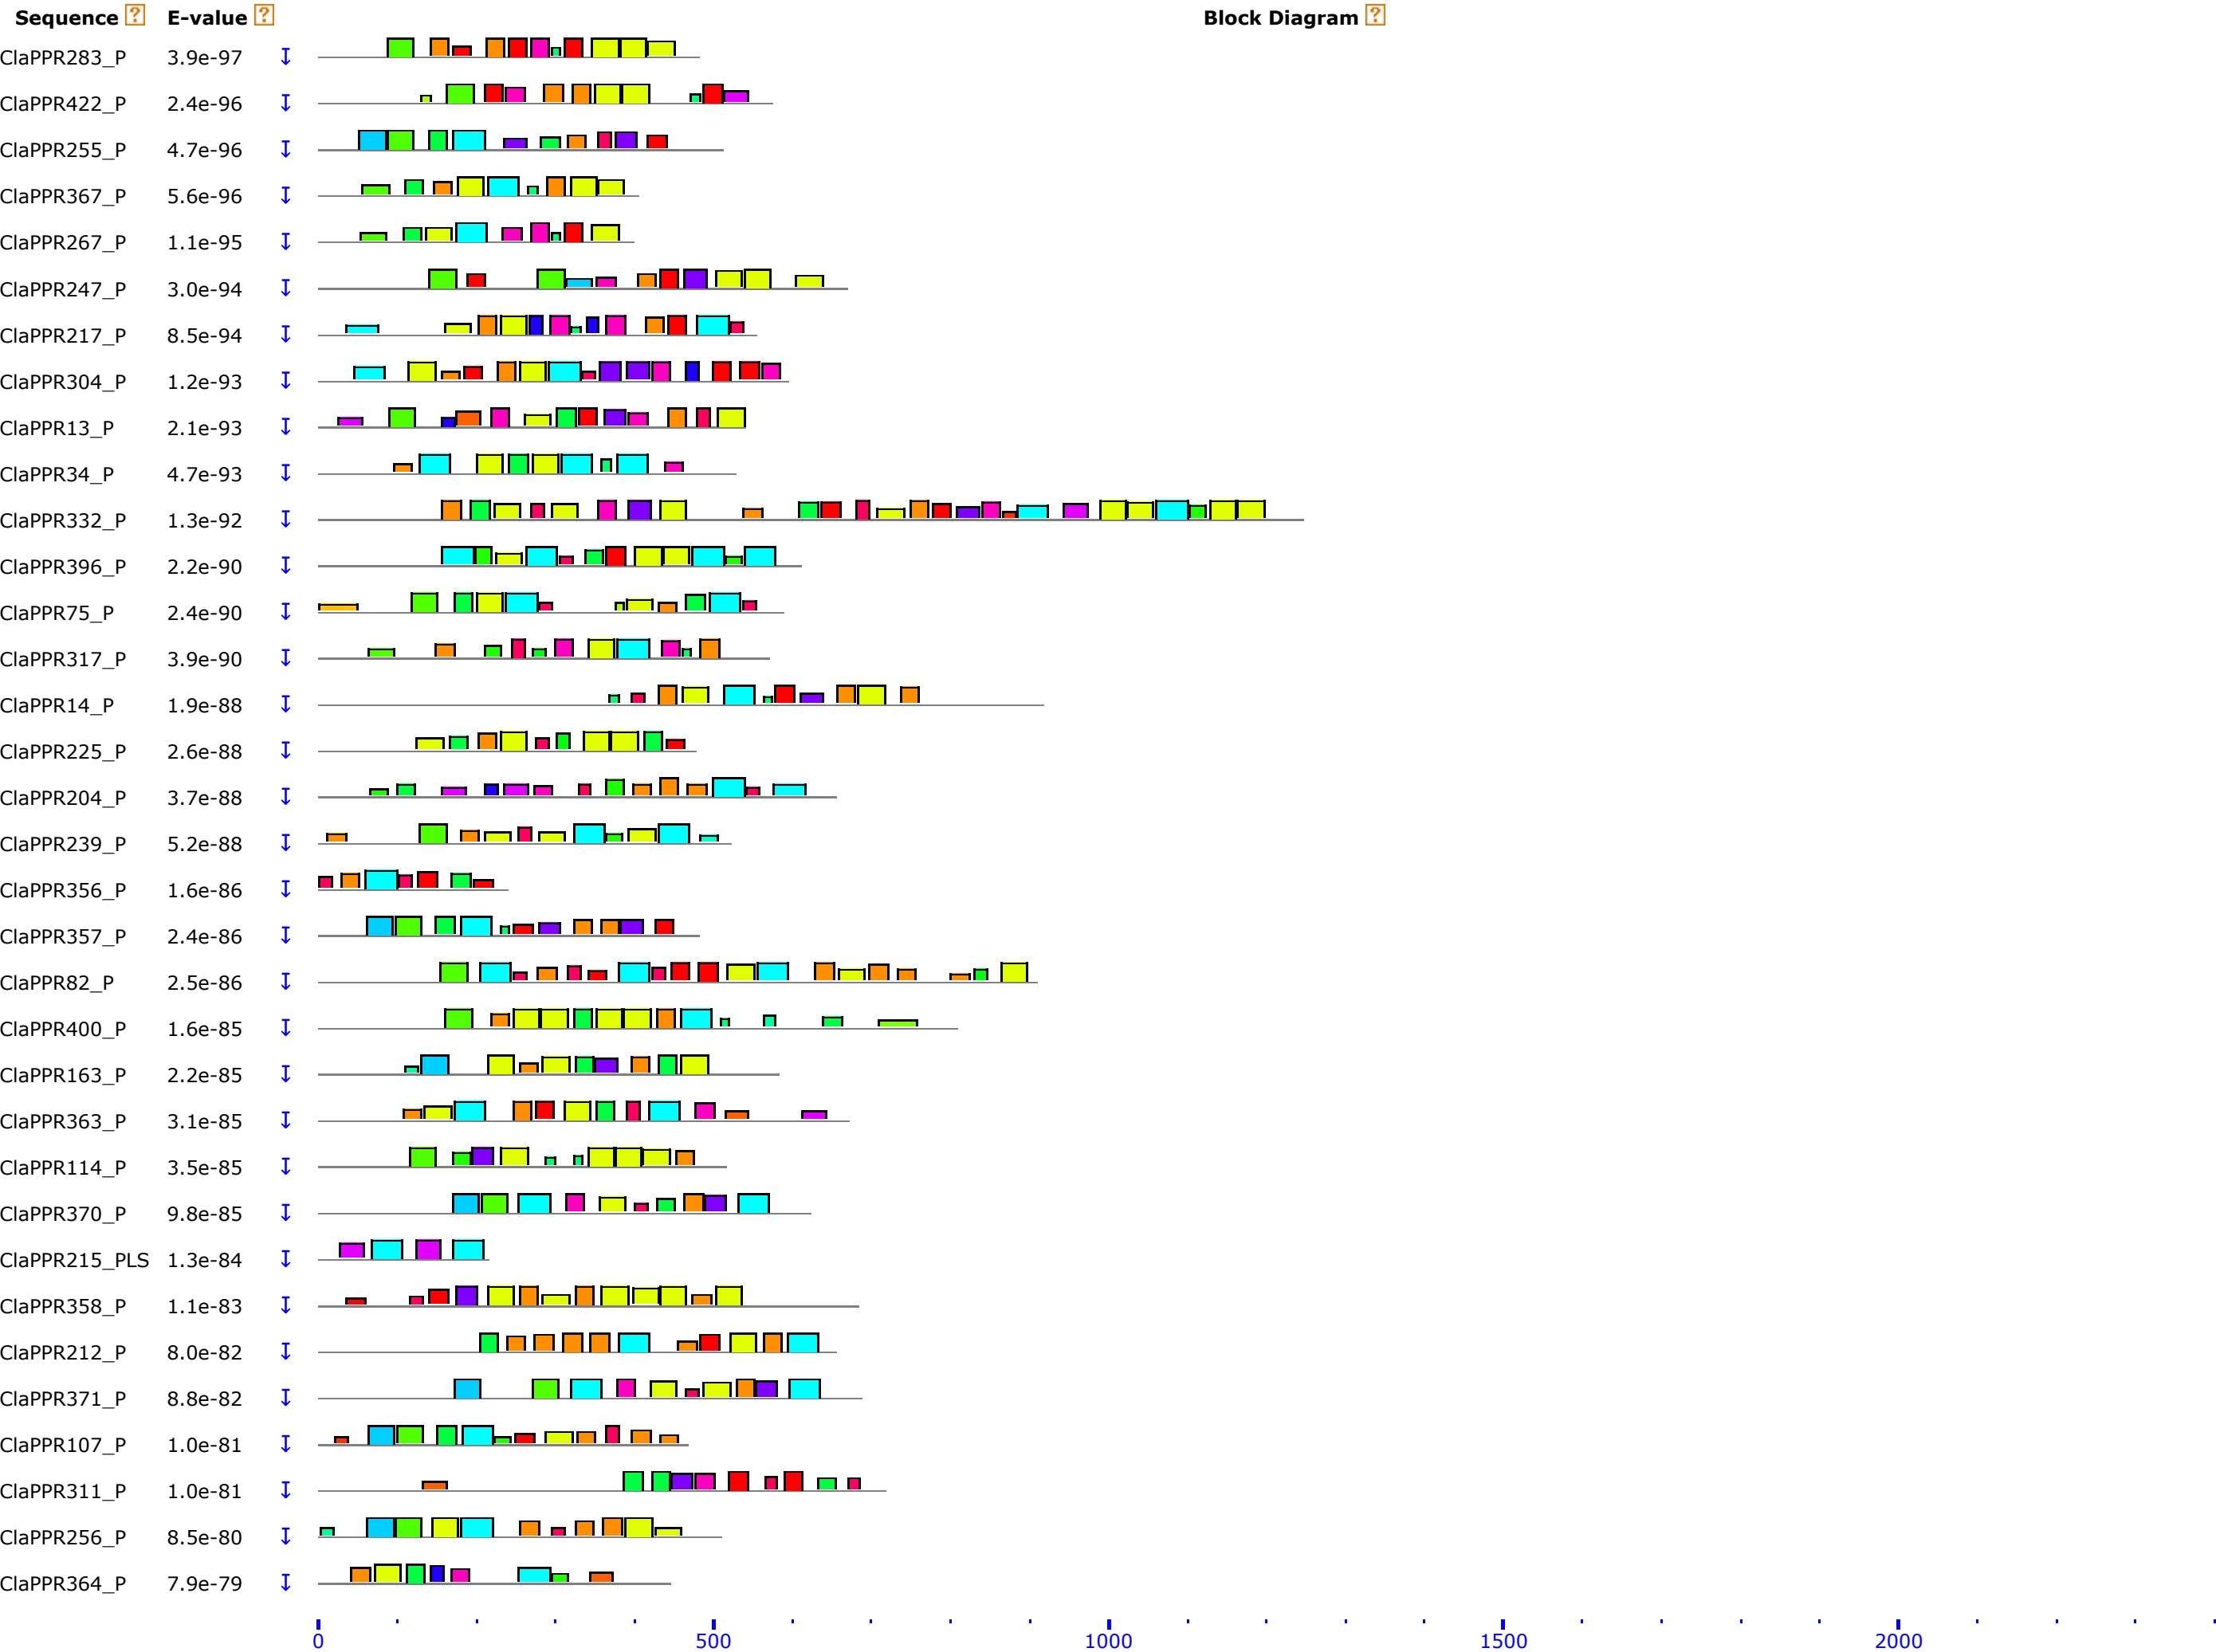

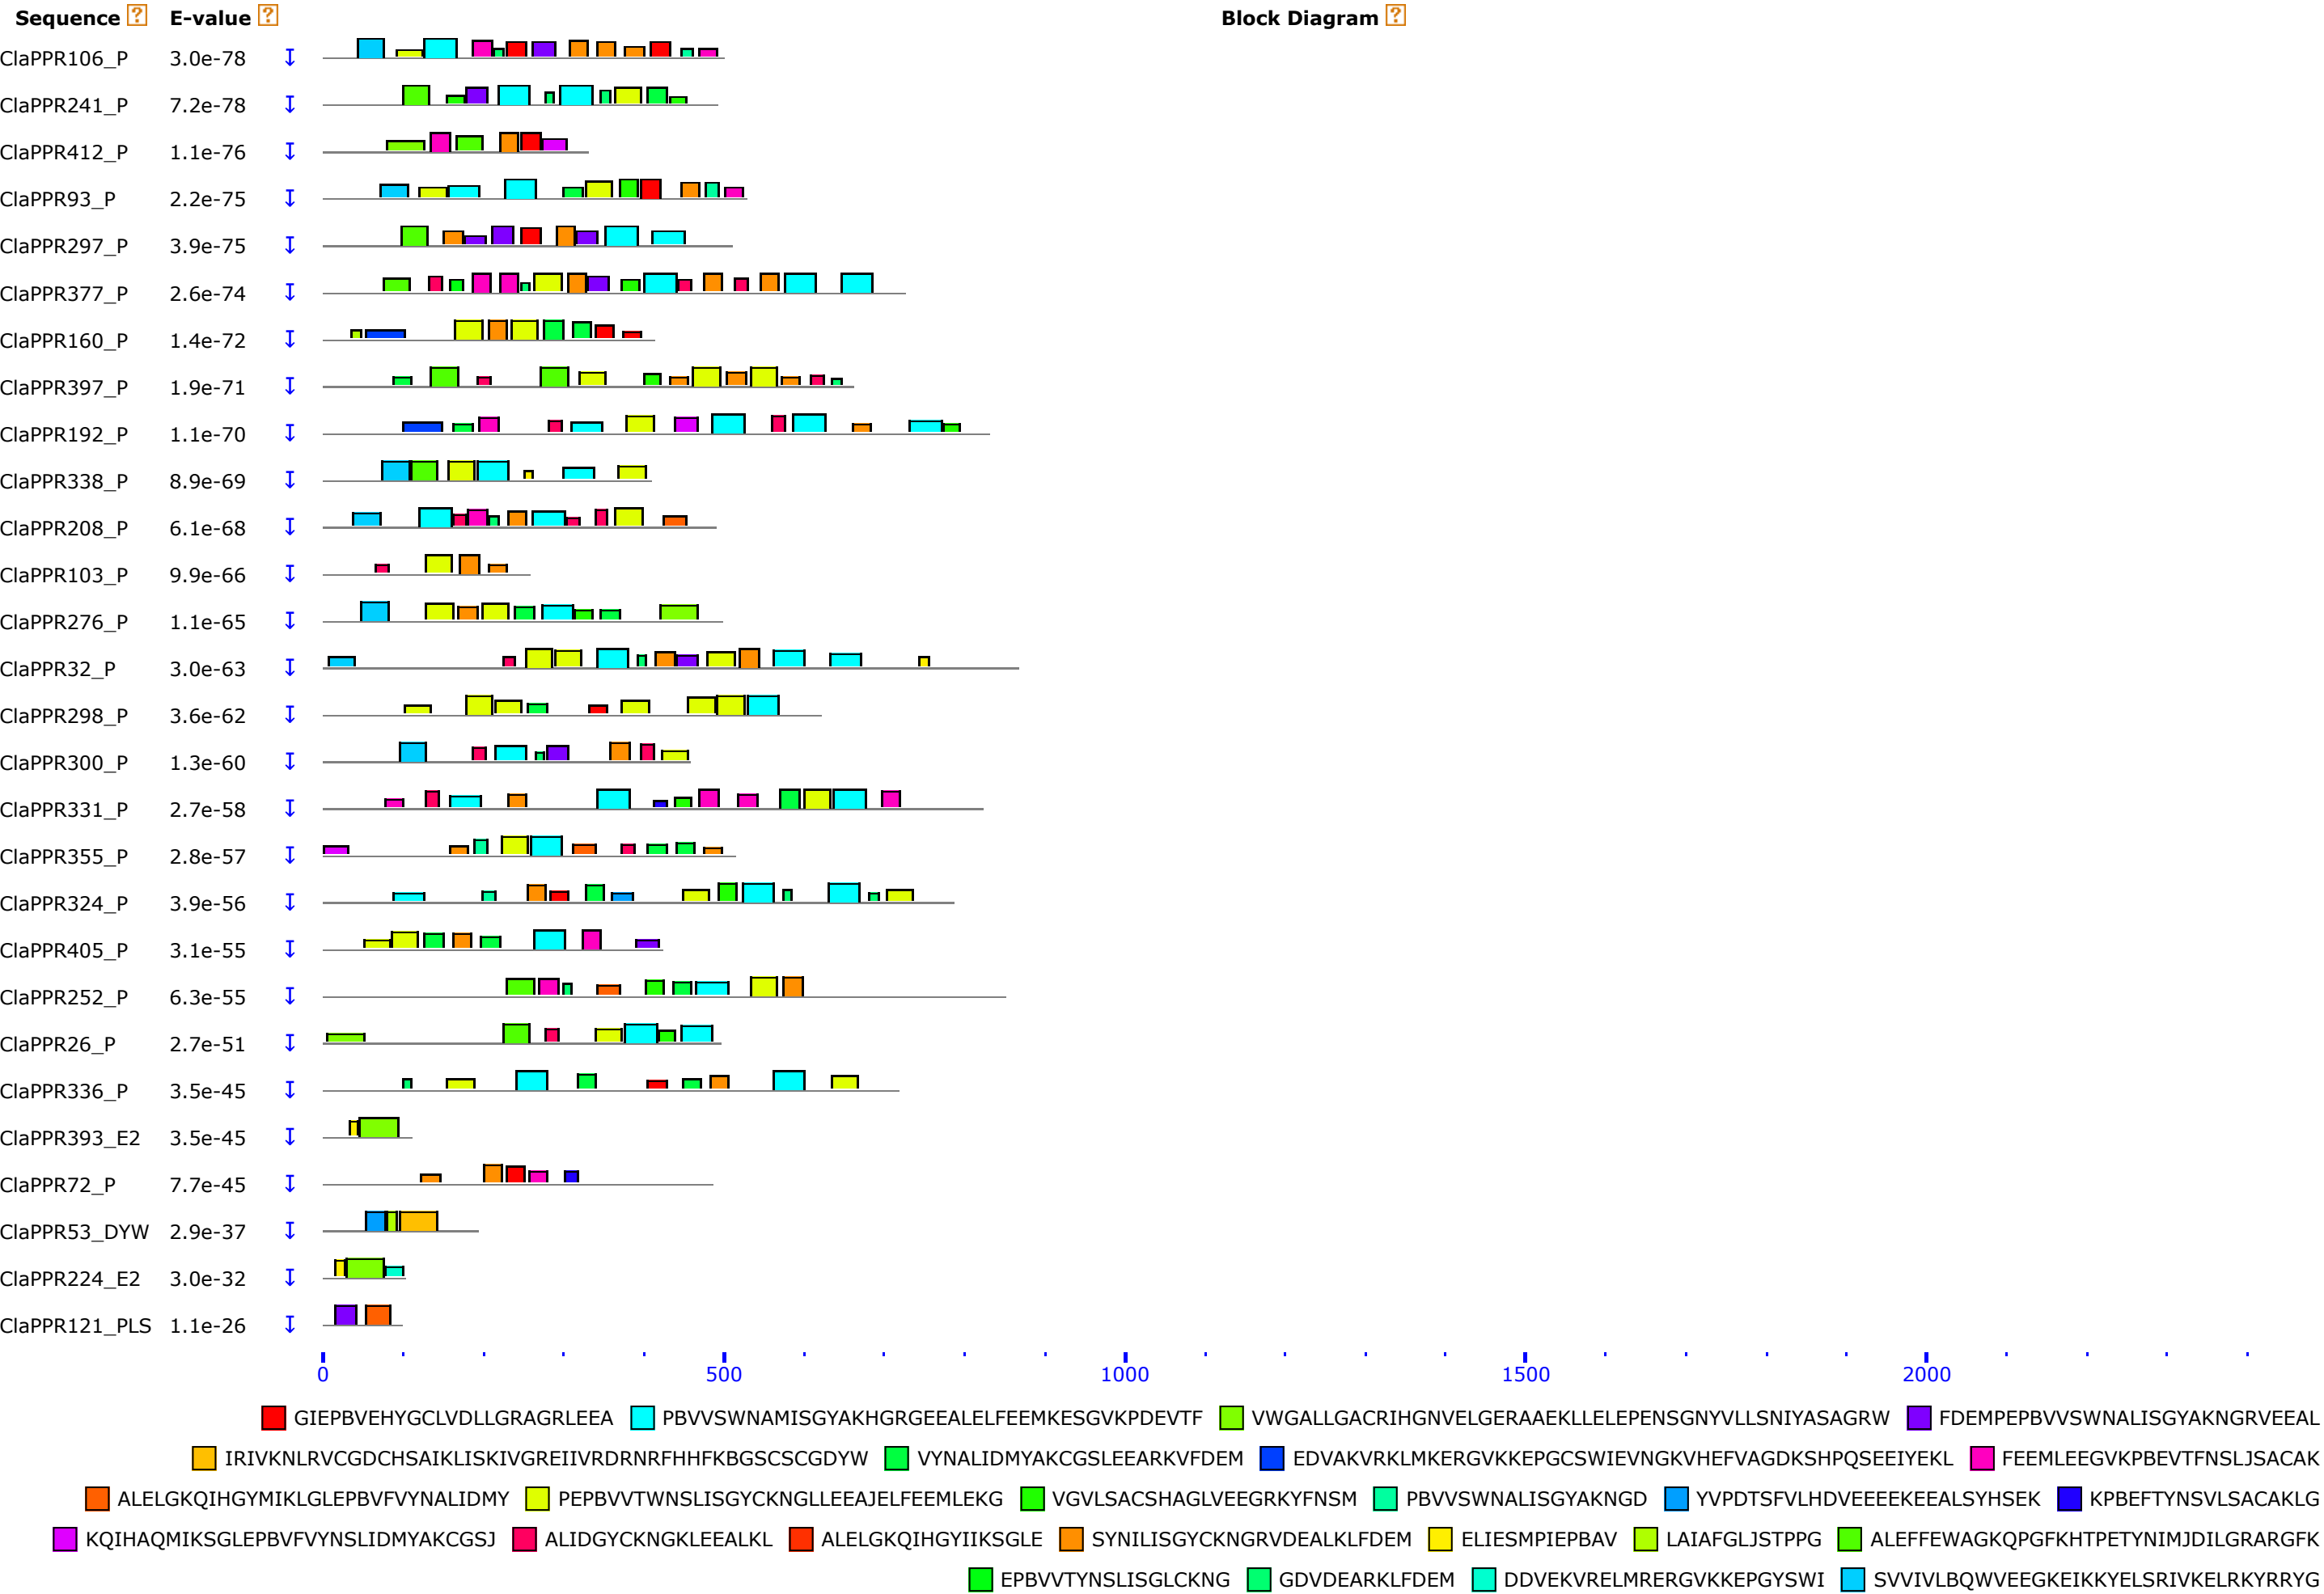

Supplement: s1 [file s1]
